# Supplementary material for: Monoterpenoid Glycosides from the Leaves of Ligustrum robustum and Their Bioactivities (II)
Source: MDPI journal article supplement (doi:10.3390/molecules28217274), 2023-10-26
Supplement: s1 [file s1]

# Monoterpenoid Glycosides from the Leaves of *Ligustrum robustum* and Their Bioactivities (II)

Shi-Hui Lu 1, 2,3,\*,†, Xiu -Xia Li 4,†, Hao-Jiang Zuo 5, Wei-Neng Li 1, Jia-Ping Pan 1 and Jing Huang 6,\*

1 College of Pharmacy, Youjiang Medical University for Nationalities, Baise 533000, China; laoli2299@163.com (W.-N.L.); 18778688727@163.com (J.-P.P.)

2 Guangxi Database Construction and Application Engineering Research Center for in Tracorporal Pharmacochemistry of TCM , Baise 533000, China

3 Key Laboratory of Youjiang Basin Characteristic Ethnic Medicine Research in Guangxi, Baise 533000, China

4 Nursing School, Youjiang Medical University for Nationalities, Baise 533000, China; axia-883333@163.com

5 Department of Laboratory Science of Public Health, West China School of Public Health, Sichuan University, Chengdu 610041, China; zuohaojiang@scu.edu.cn

6 Key Laboratory of Drug Targeting, Ministry of Education, West China School of Pharmacy, Sichuan University, Chengdu 610041, China

\* Correspondence: lushihui0818@126.com (S.-H.L.); huangj\_pharm@scu.edu.cn (J.H.)

† These authors contributed equally to this work.

Figures S1-S6: <sup>1</sup>H NMR, <sup>13</sup>C NMR, <sup>1</sup>H-<sup>1</sup>H COSY, HSQC, HMBC, NOEDS, HRESIMS and IR spectra of compounds **1** (Figure S1), **2** (Figure S2), **3** (Figure S3), **4** (Figure S4), **5** (Figure S5) and **6** (Figure S6);

S1: <sup>1</sup>H NMR and <sup>13</sup>C NMR data of compounds **4a**, **6a**, **7**, **8a** and **8b**;

S2: determination of bioactivities.

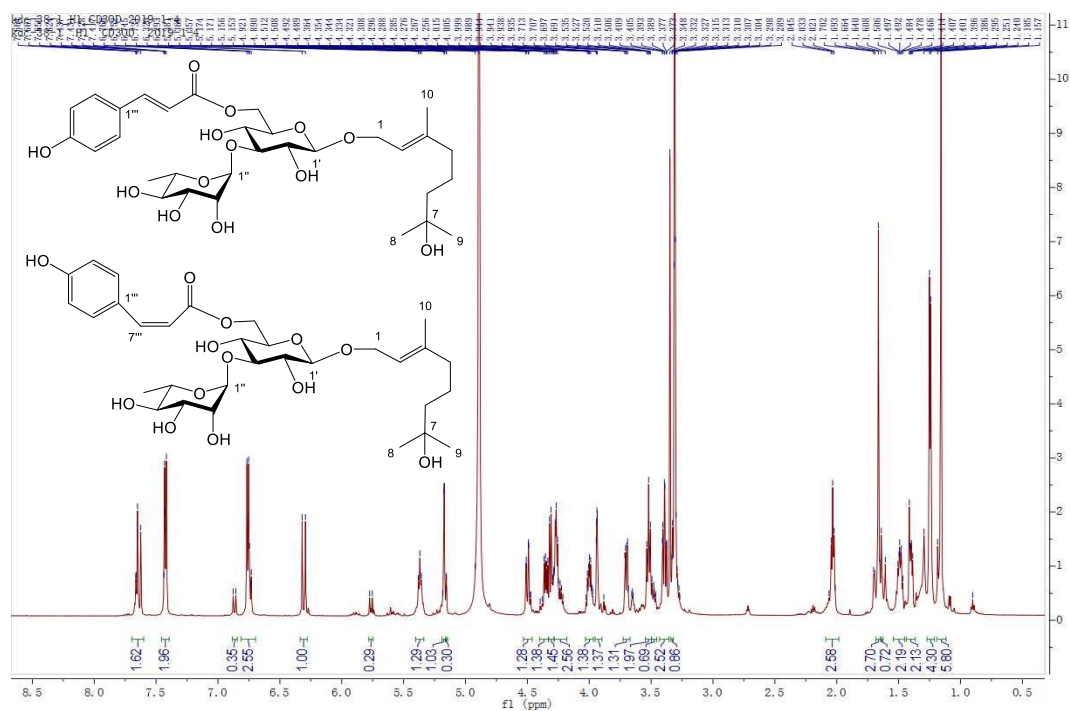

Figure S1-1  $^1\text{H}$  NMR spectrum of compound **1** in  $\text{CD}_3\text{OD}$  (600 MHz)

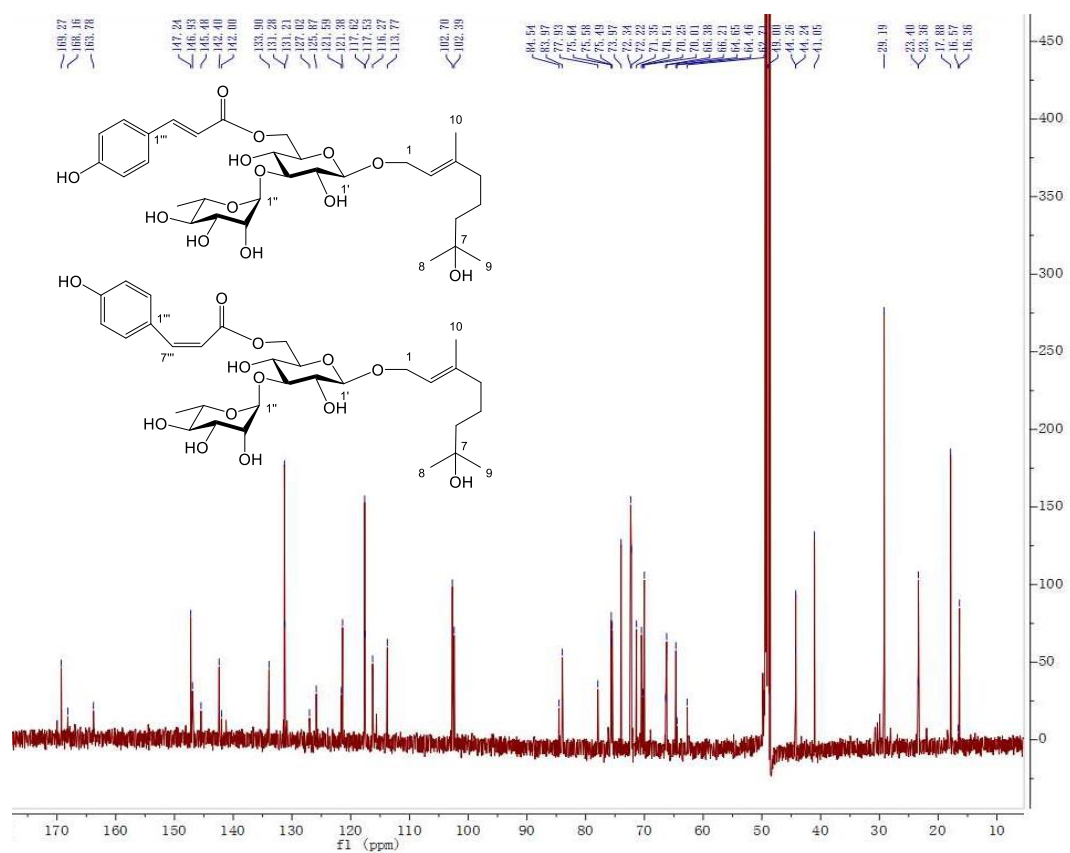

Figure S1-2  $^{13}\text{C}$  NMR spectrum of compound **1** in  $\text{CD}_3\text{OD}$  (150 MHz)

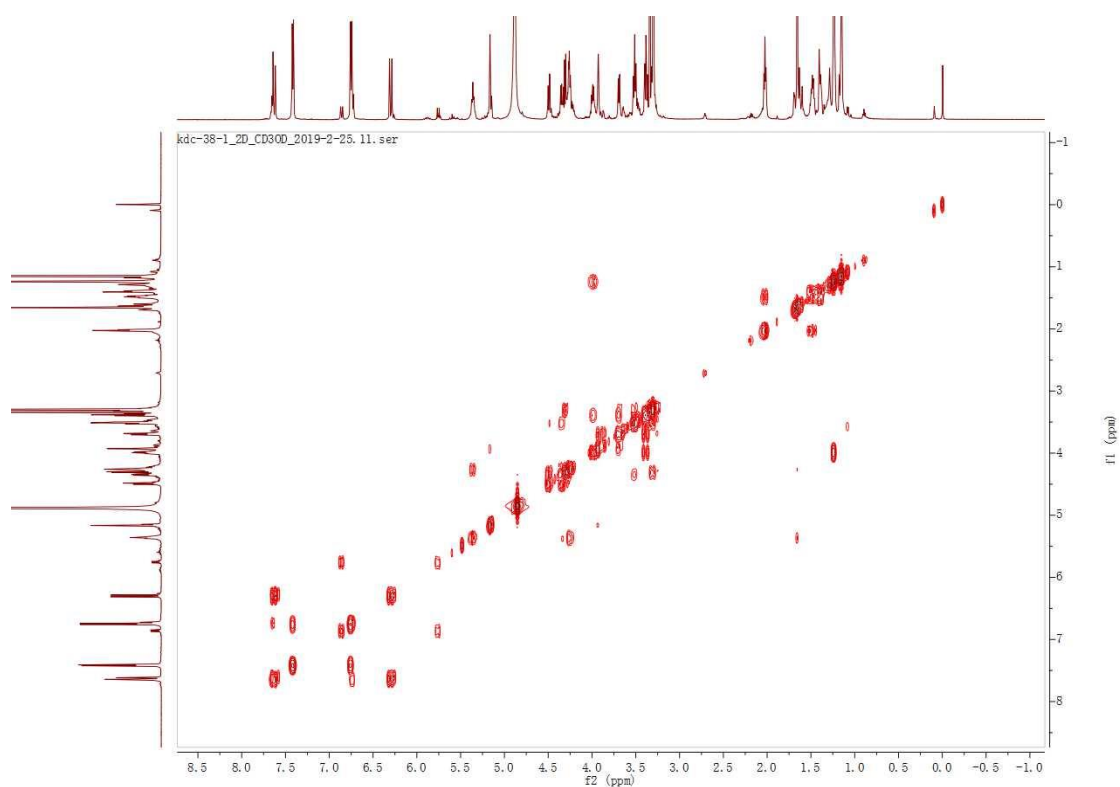

Figure S1-3  $^1\text{H}$ - $^1\text{H}$  COSY spectrum of compound **1** in  $\text{CD}_3\text{OD}$

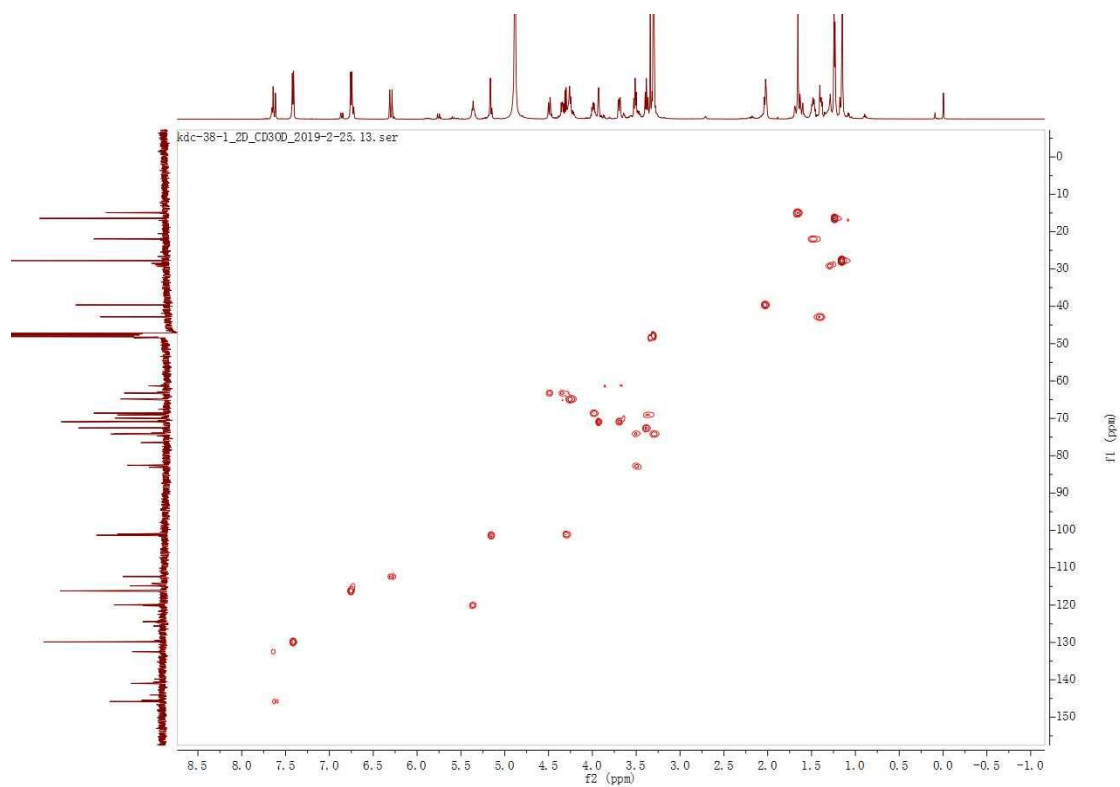

Figure S1-4 HSQC spectrum of compound **1** in  $\text{CD}_3\text{OD}$

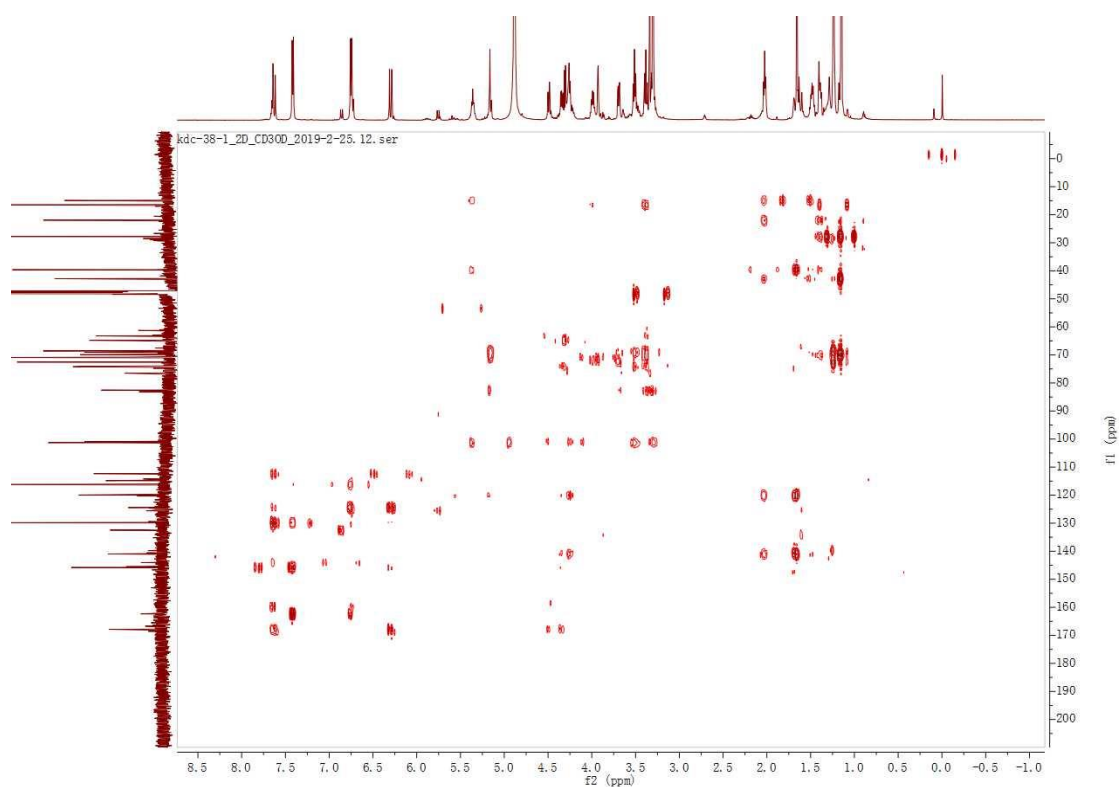

Figure S1-5 HMBC spectrum of compound **1** in CD<sub>3</sub>OD

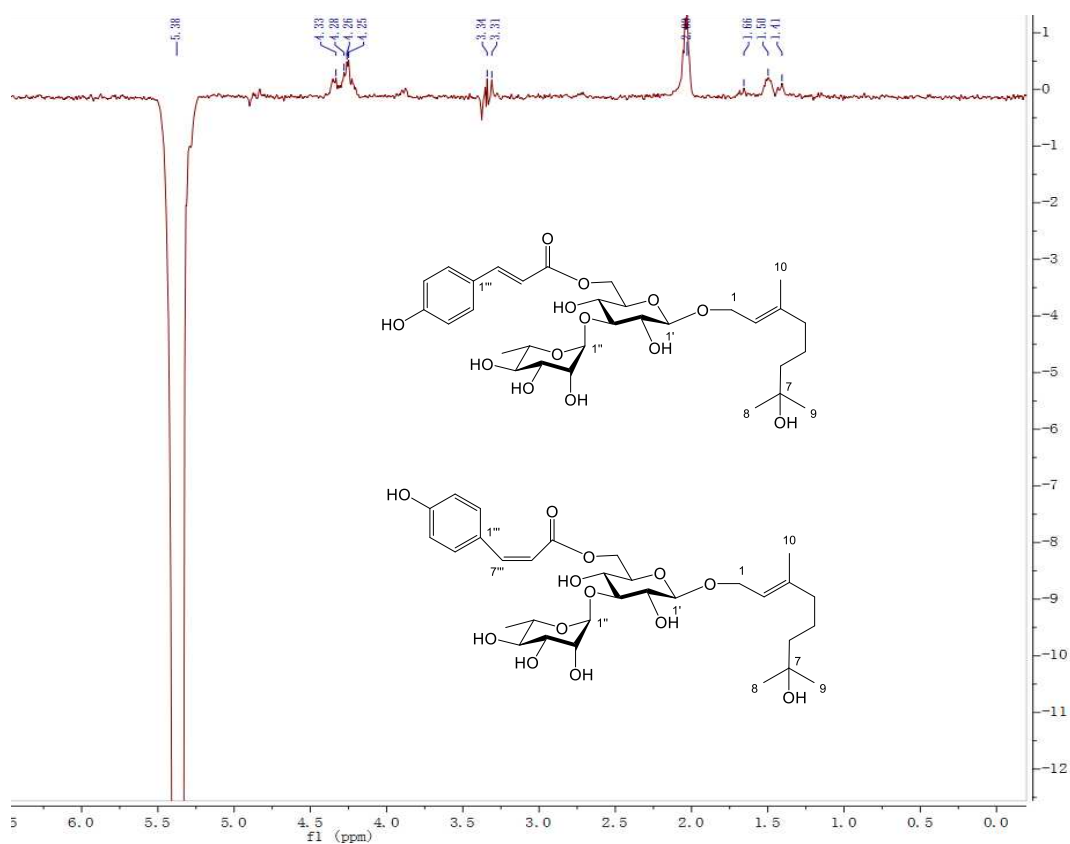

Figure S1-6 NOESY spectrum of compound **1** in CD<sub>3</sub>OD (600 MHz)

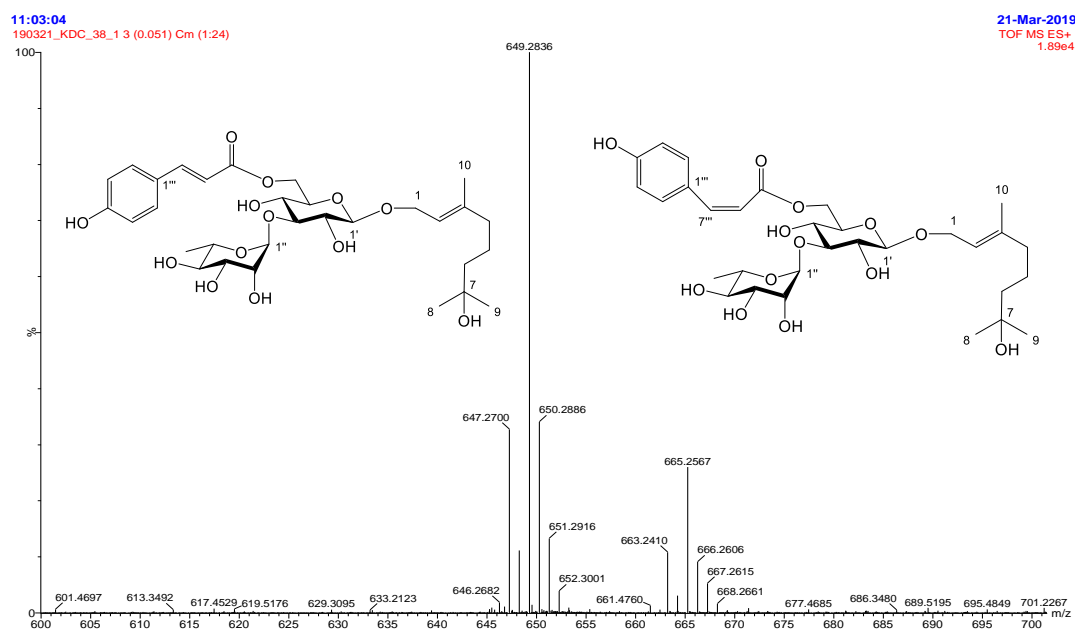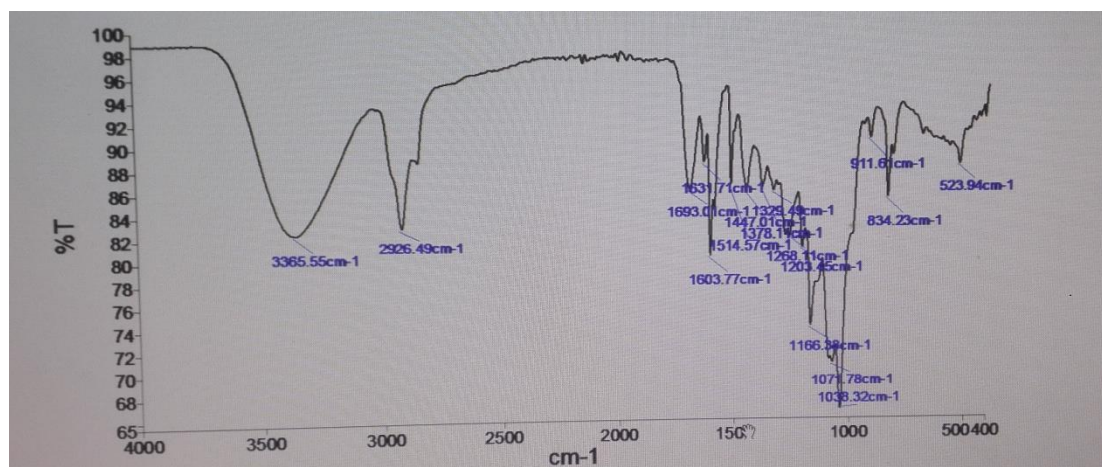

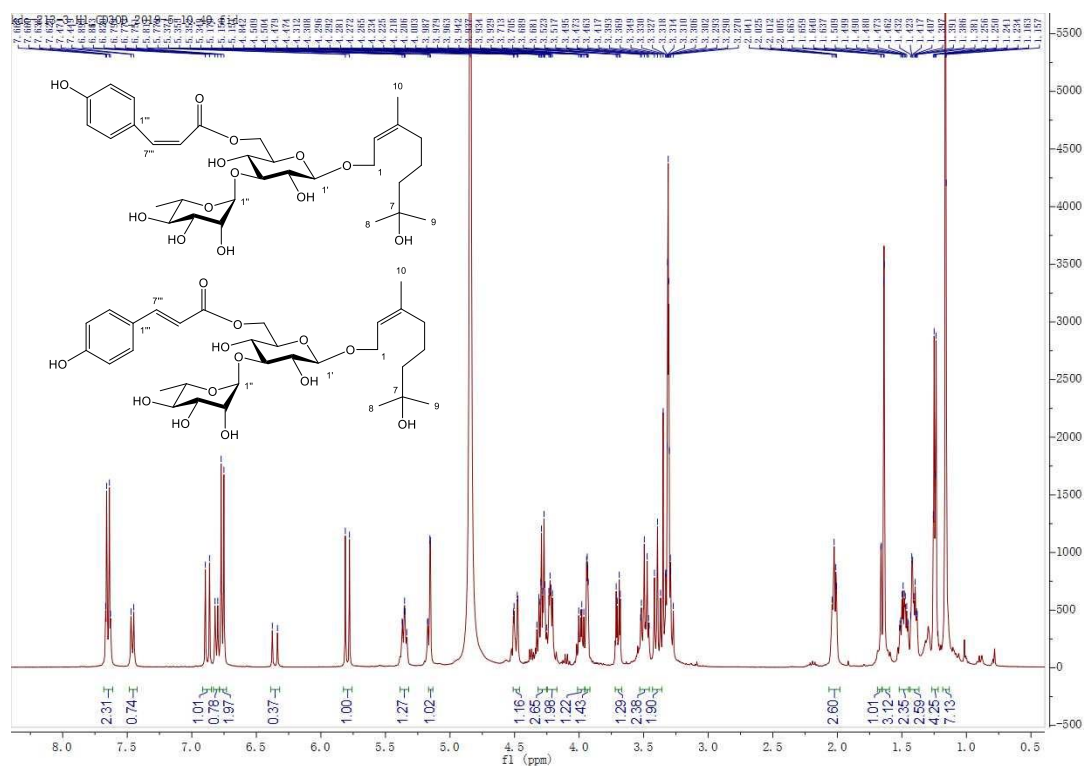

Figure S2-1 <sup>1</sup>H NMR spectrum of compound **2** in CD<sub>3</sub>OD (400 MHz)

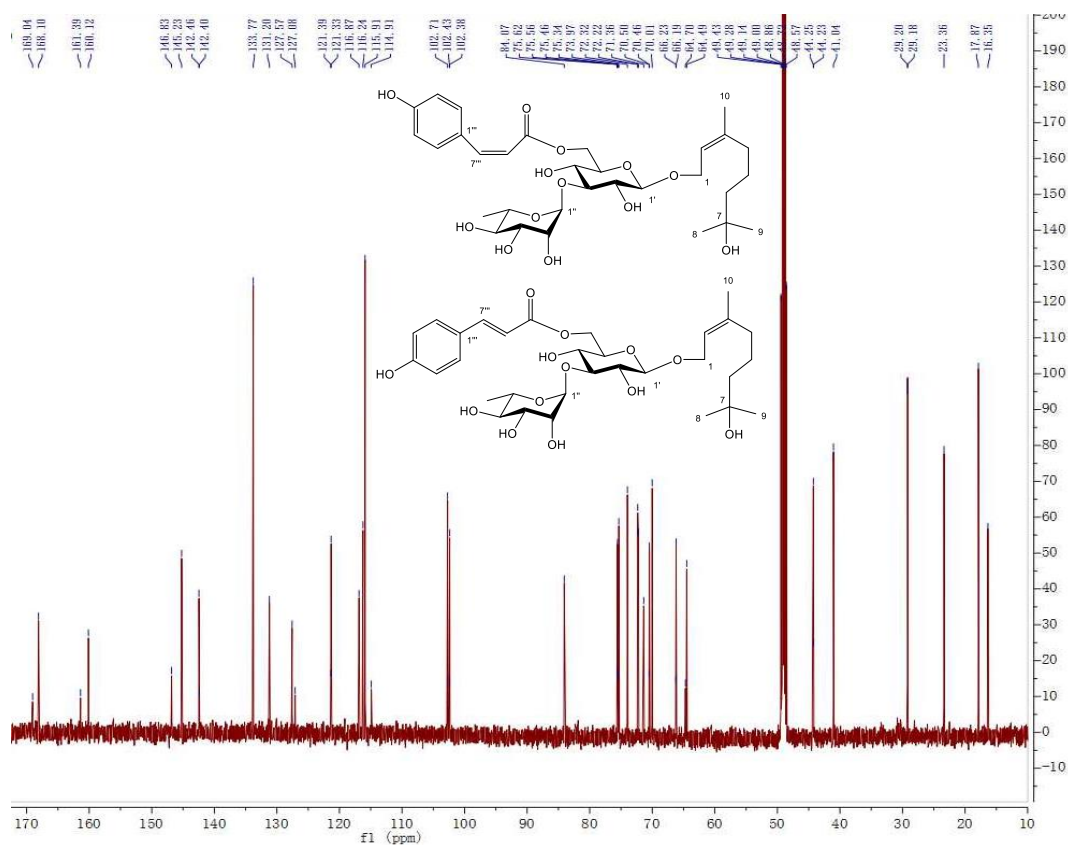

Figure S2-2 <sup>13</sup>C NMR spectrum of compound **2** in CD<sub>3</sub>OD (150 MHz)

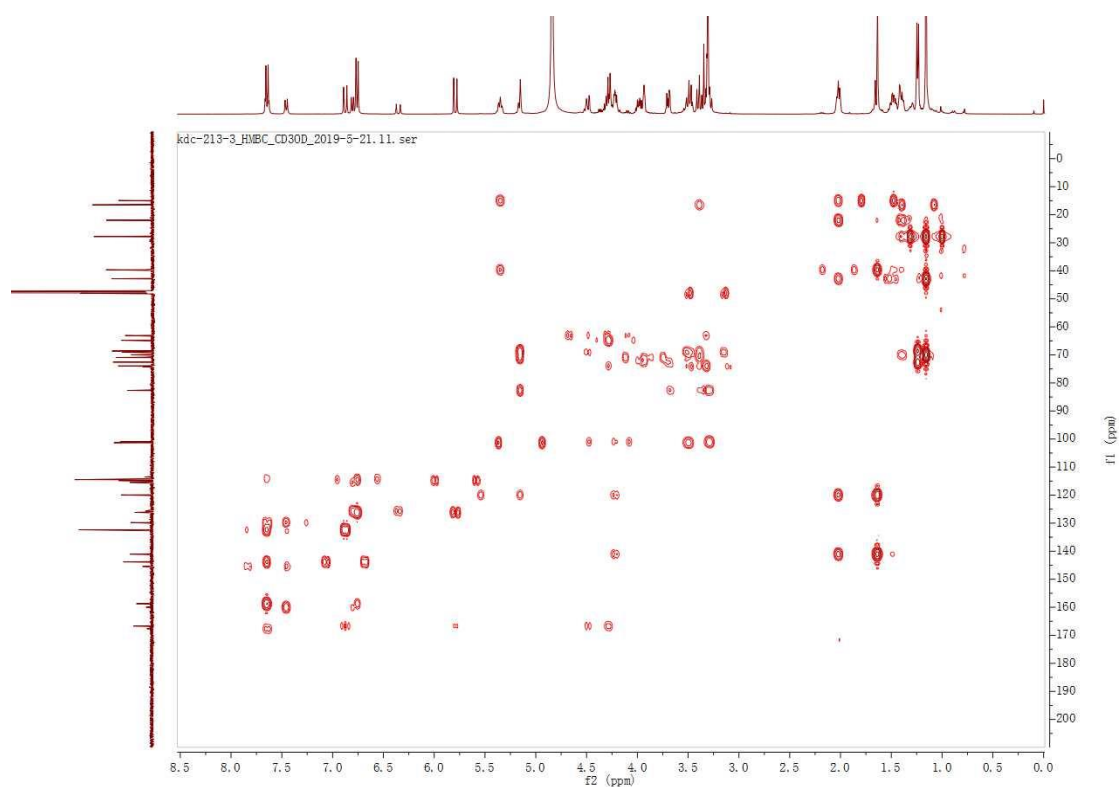

Figure S2-3 HMBC spectrum of compound **2** in CD<sub>3</sub>OD

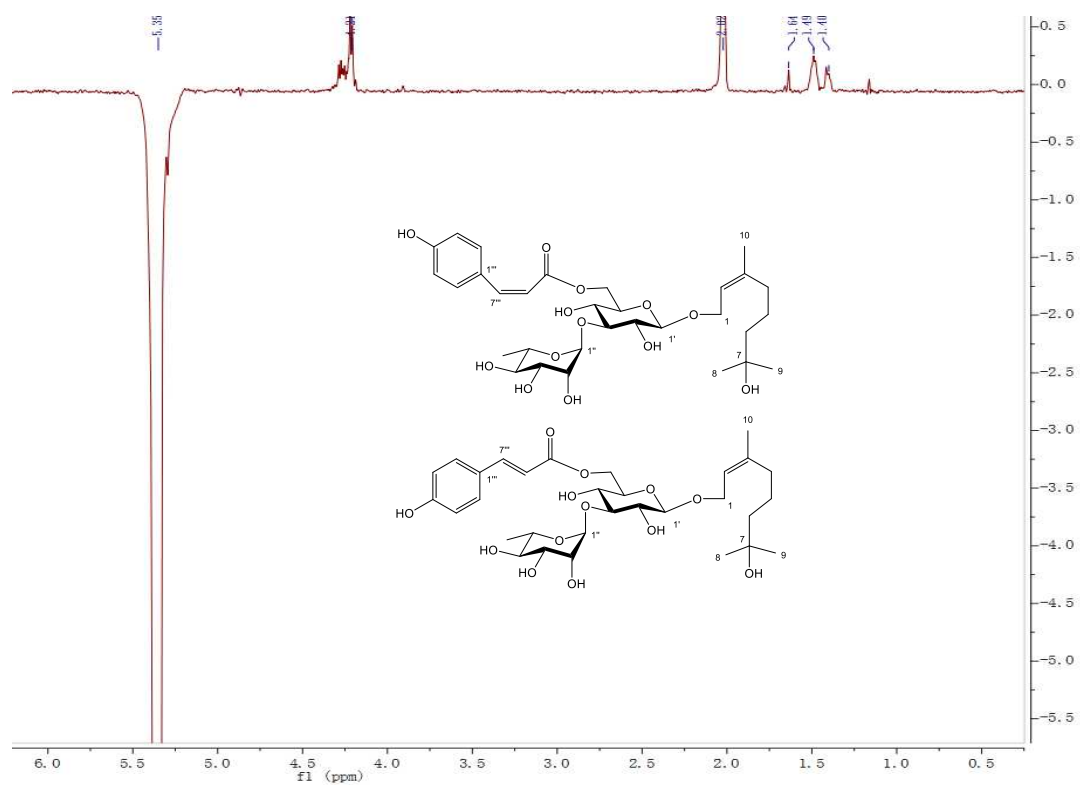

Figure S2-4 NOESY spectrum of compound **2** in CD<sub>3</sub>OD (600 MHz)



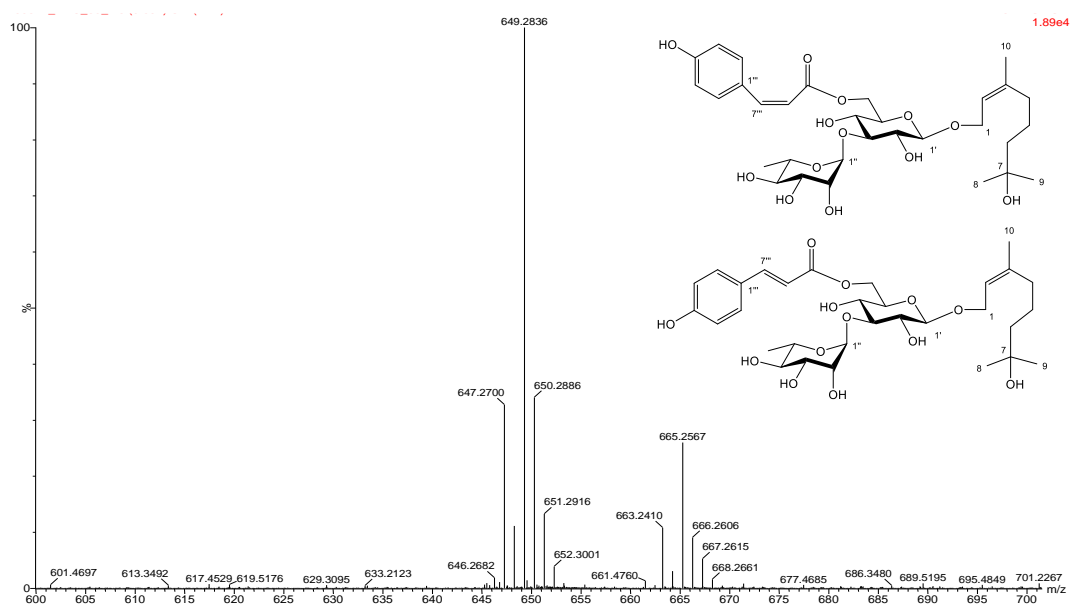

Figure S2-5 HRESIMS spectrum of compound **2**

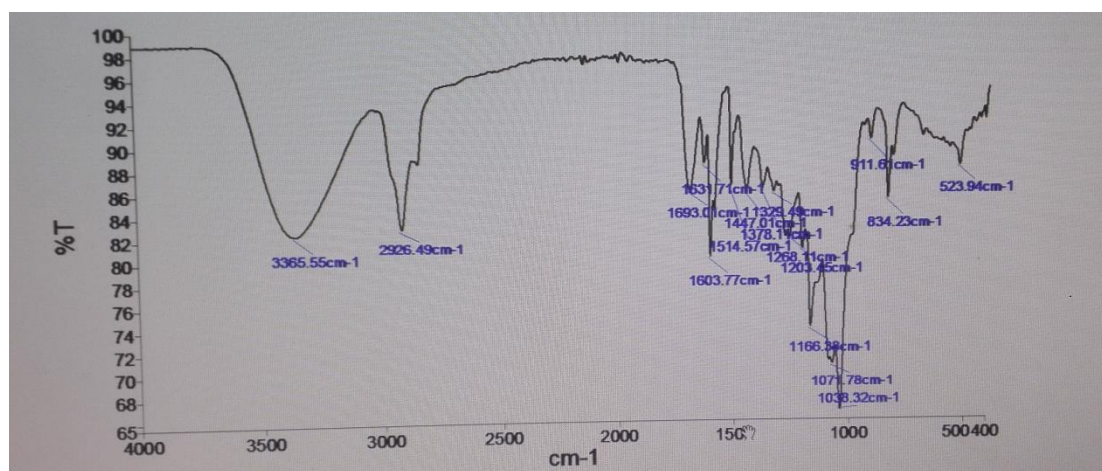

Figure S2-6 IR spectrum of compound **2** (film)



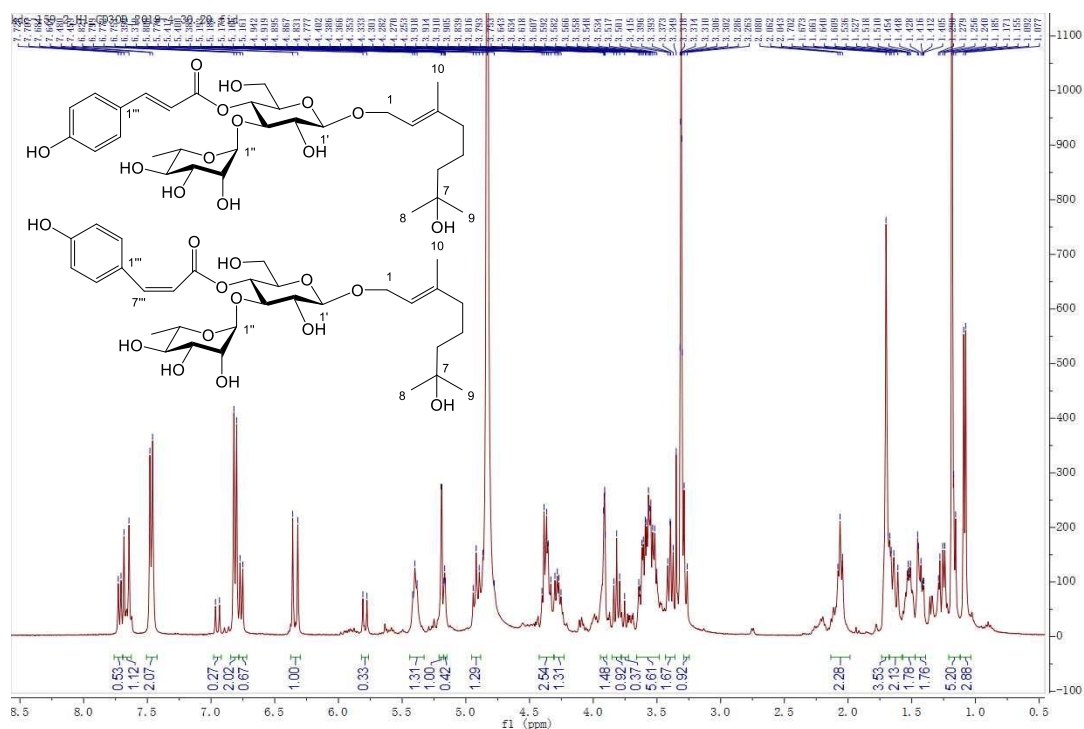

Figure S3-1 <sup>1</sup>H NMR spectrum of compound **3** in CD<sub>3</sub>OD (400 MHz)

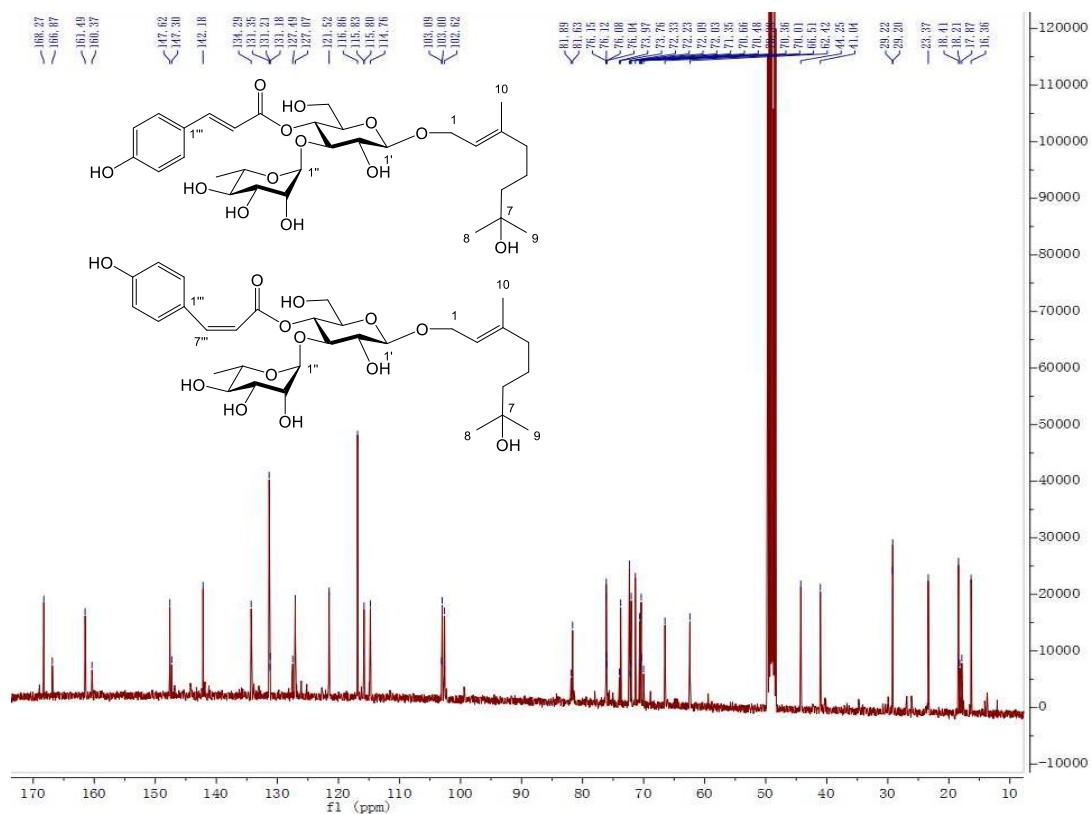

Figure S3-2 <sup>13</sup>C NMR spectrum of compound **3** in CD<sub>3</sub>OD (100 MHz)

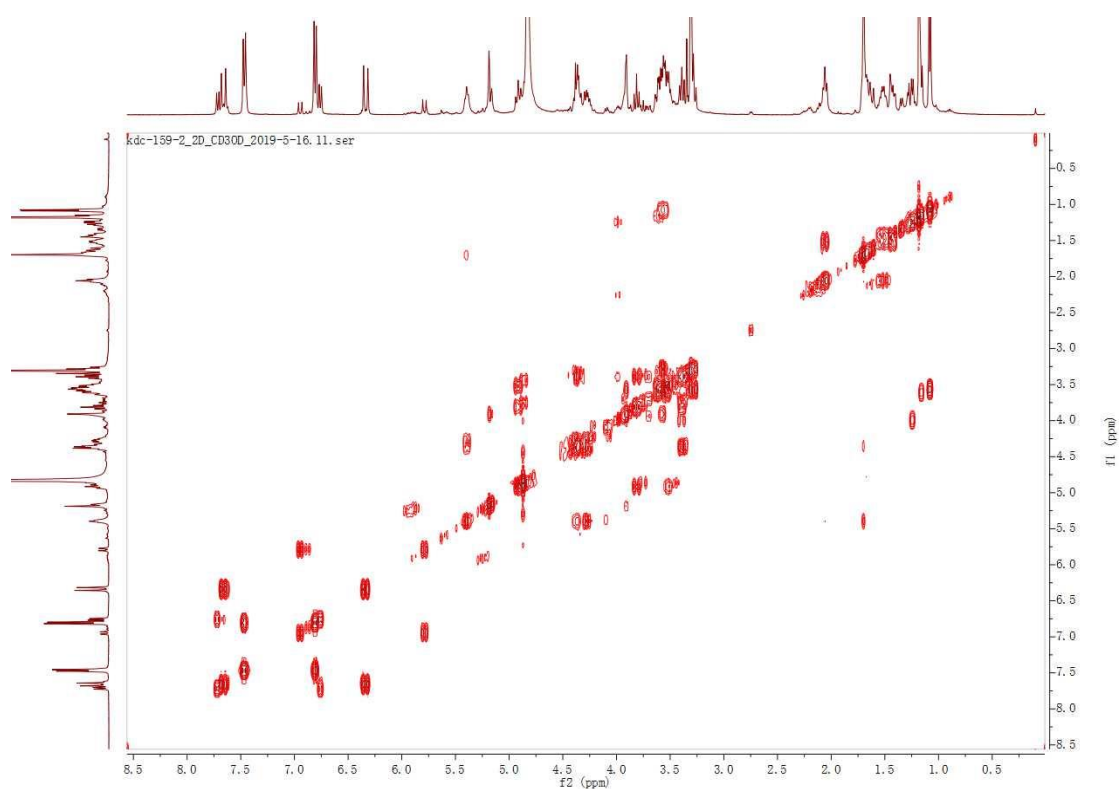

Figure S3-3  $^1\text{H}$ - $^1\text{H}$  COSY spectrum of compound **3** in  $\text{CD}_3\text{OD}$

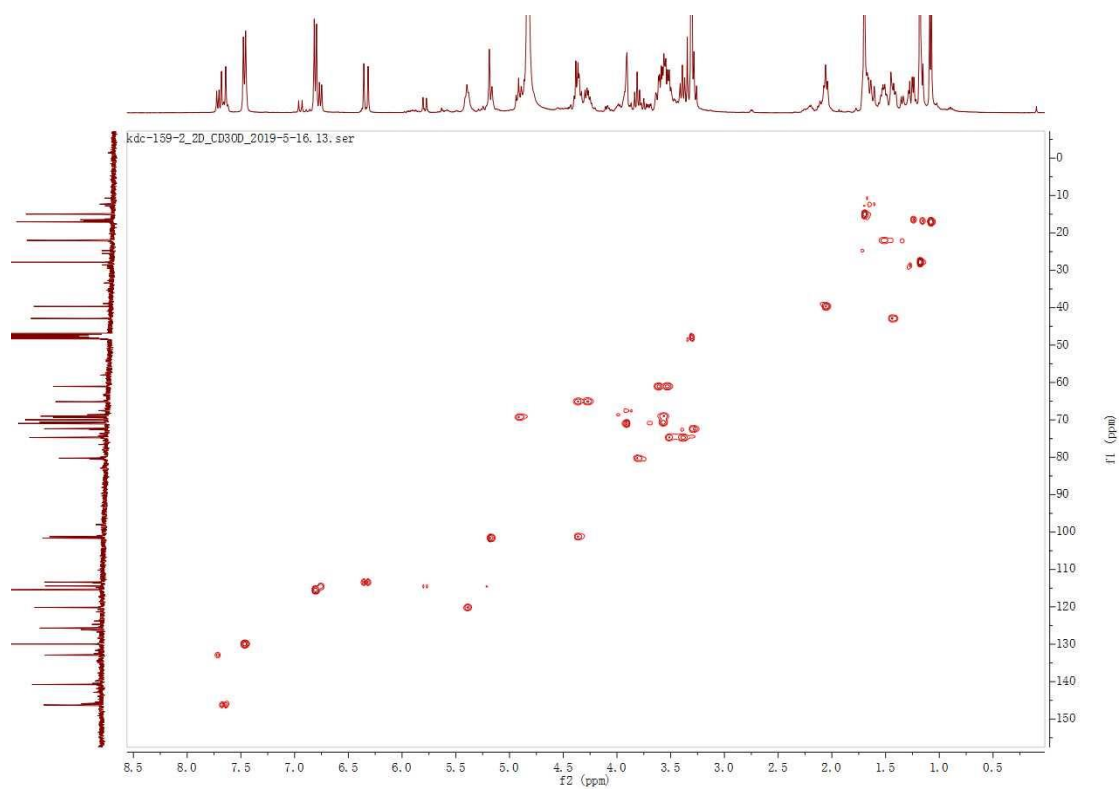

Figure S3-4 HSQC spectrum of compound **3** in  $\text{CD}_3\text{OD}$

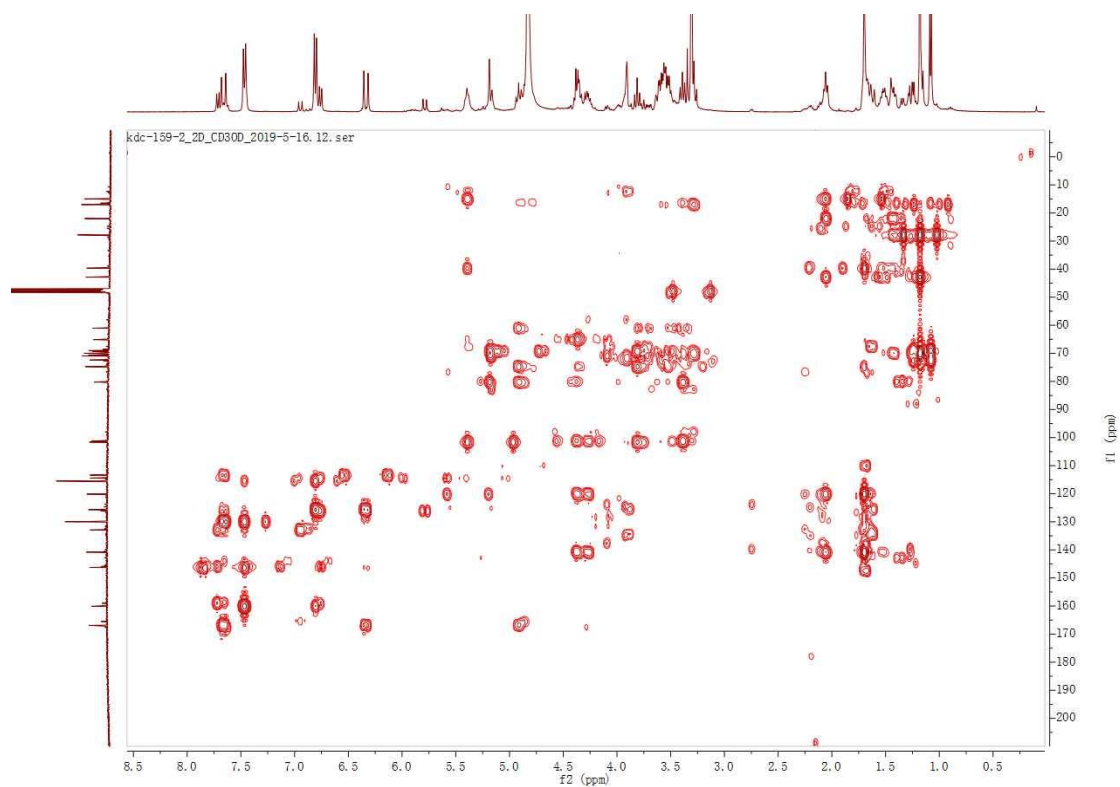

Figure S3-5 HMBC spectrum of compound **3** in CD<sub>3</sub>OD

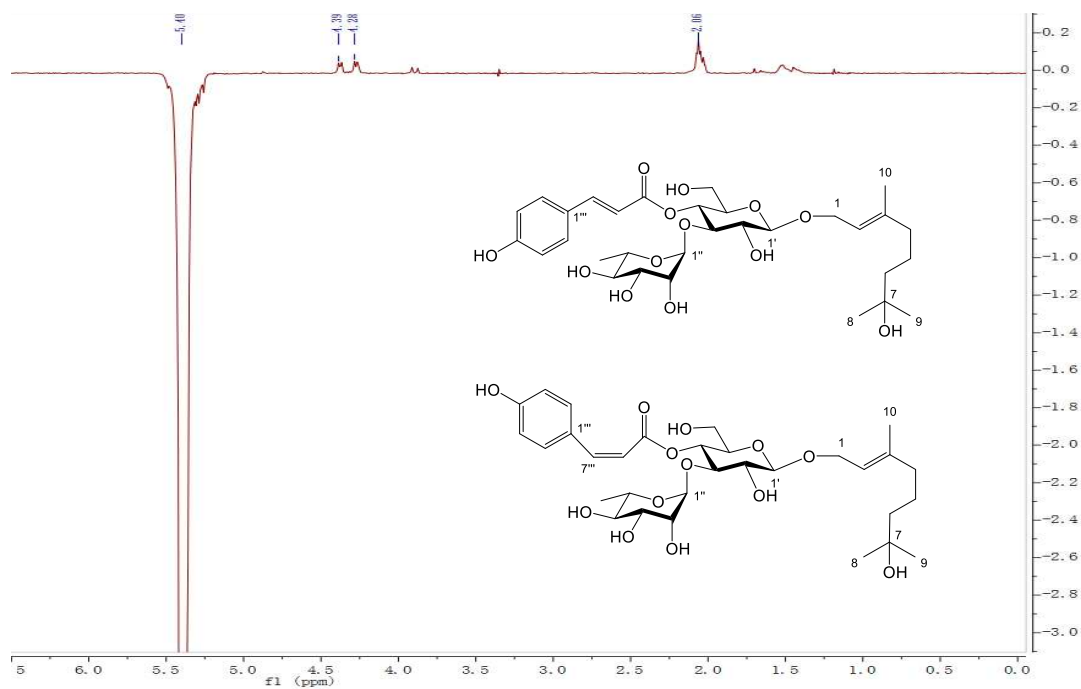

Figure S3-6 NOEDS spectrum of compound **3** in CD<sub>3</sub>OD (600 MHz)

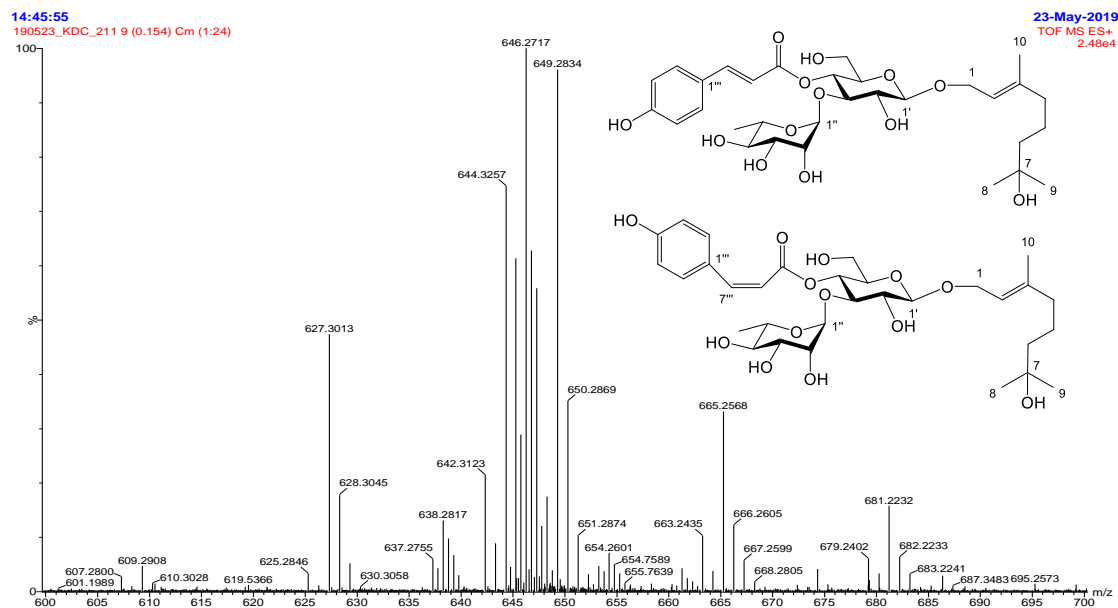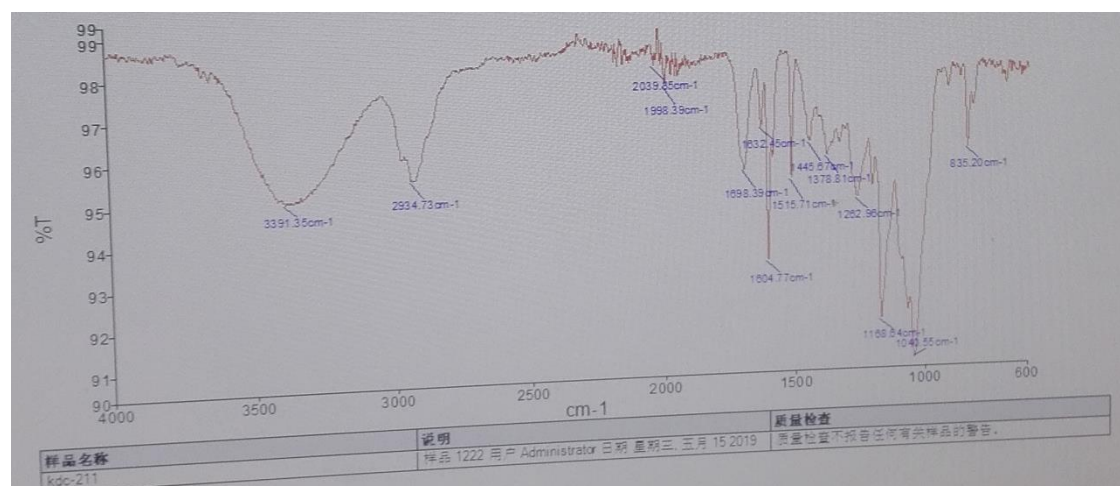

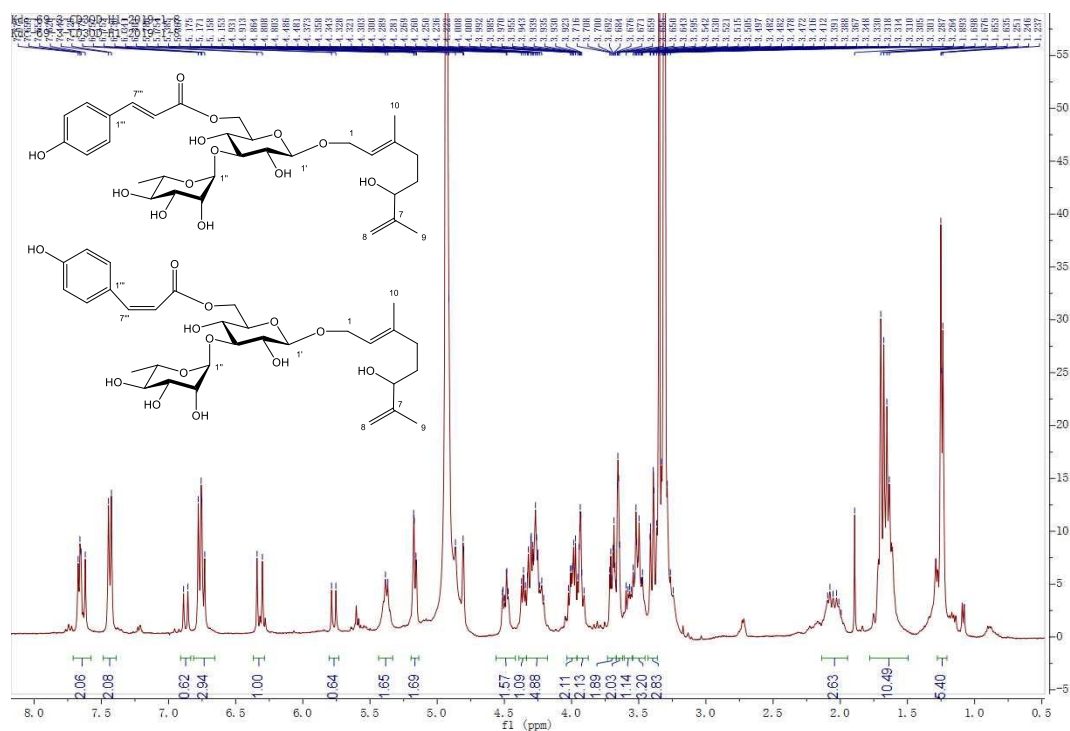

Figure S4-1 <sup>1</sup>H NMR spectrum of compound **4** in CD<sub>3</sub>OD (400 MHz)

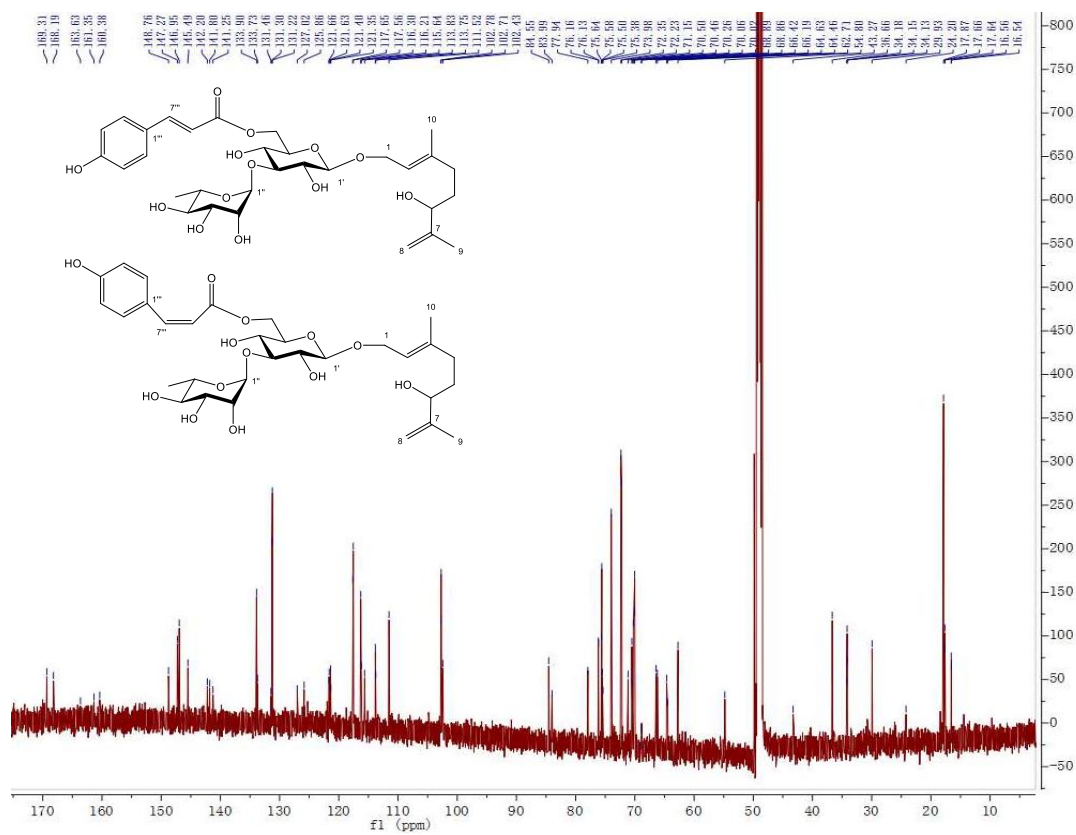

Figure S4-2 <sup>13</sup>C NMR spectrum of compound **4** in CD<sub>3</sub>OD (150 MHz)

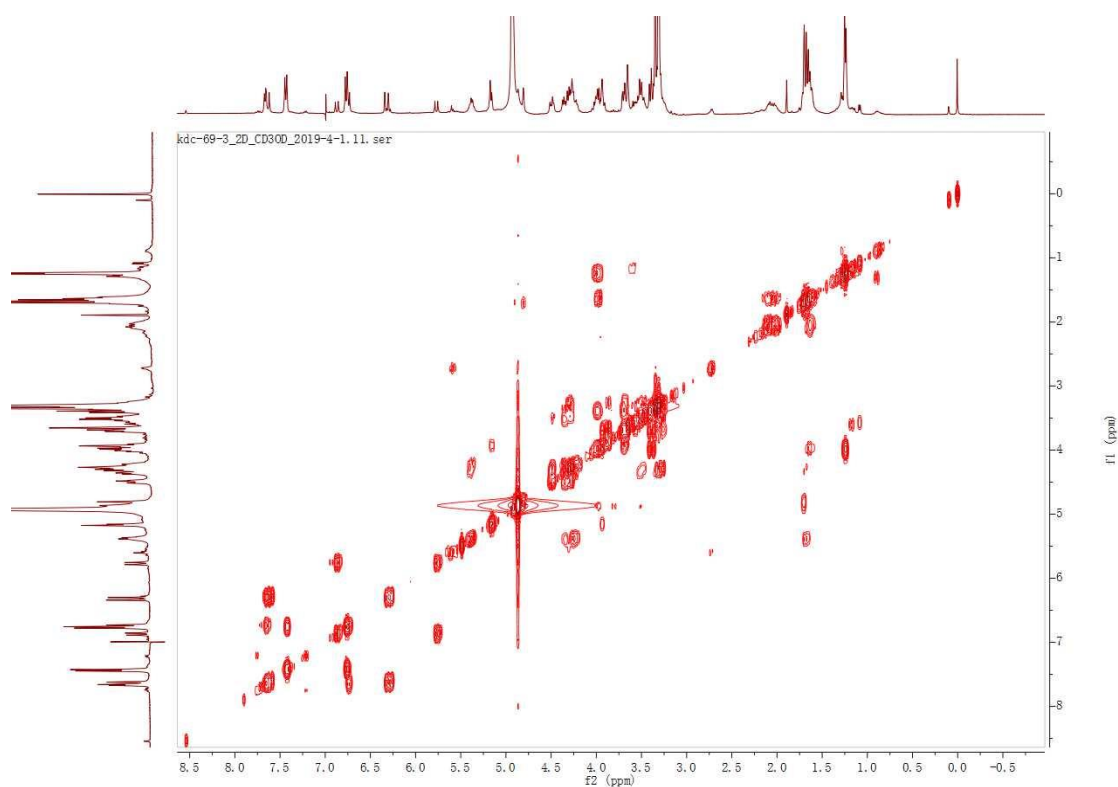

Figure S4-3  $^1\text{H}$ - $^1\text{H}$  COSY spectrum of compound **4** in  $\text{CD}_3\text{OD}$

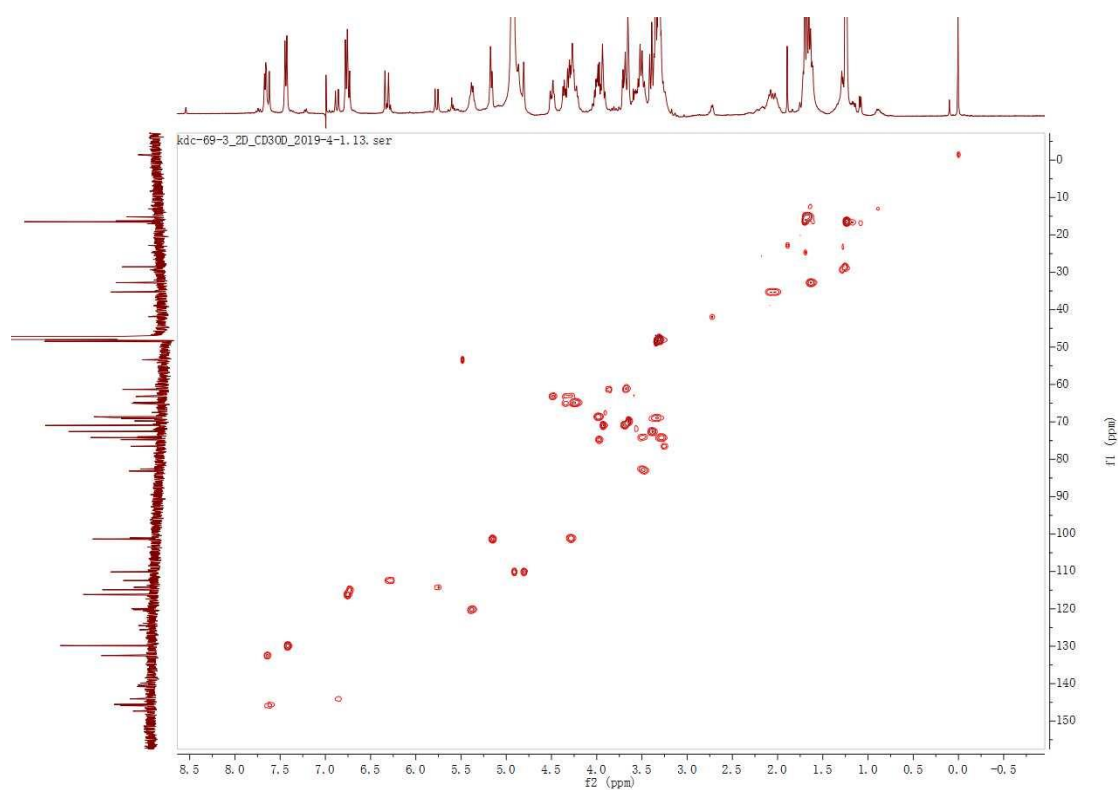

Figure S4-4 HSQC spectrum of compound **4** in  $\text{CD}_3\text{OD}$

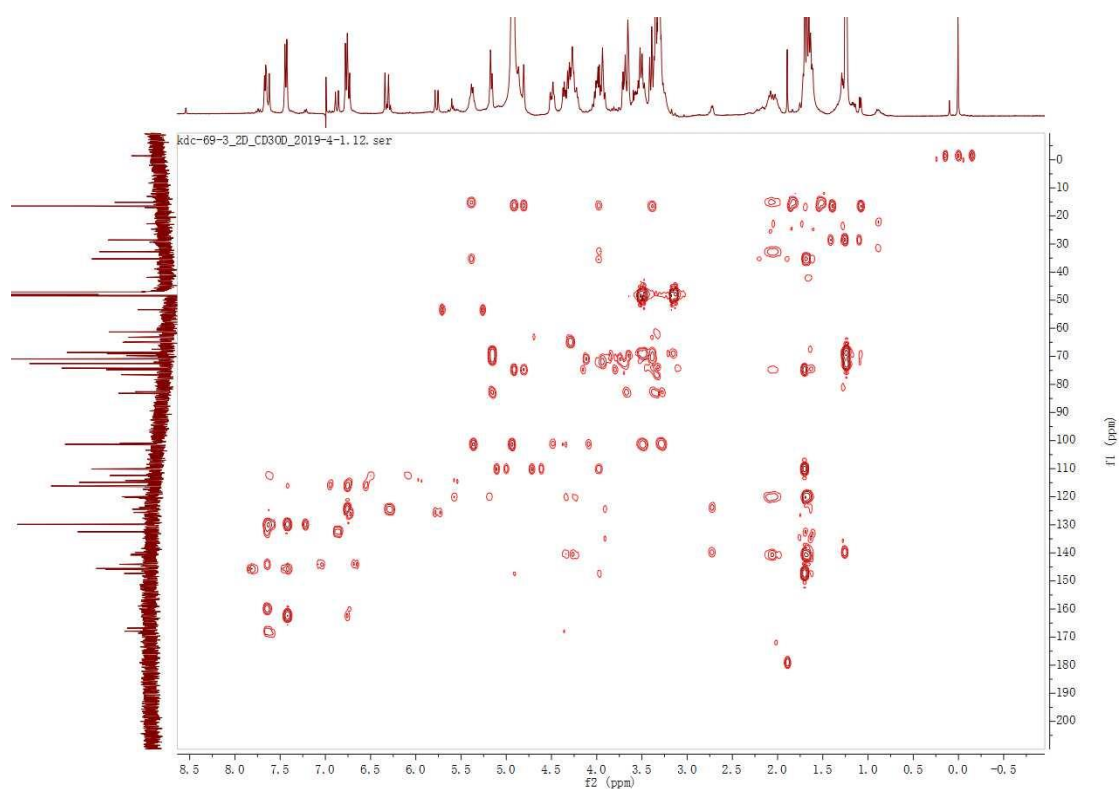

Figure S4-5 HMBC spectrum of compound **4** in CD<sub>3</sub>OD

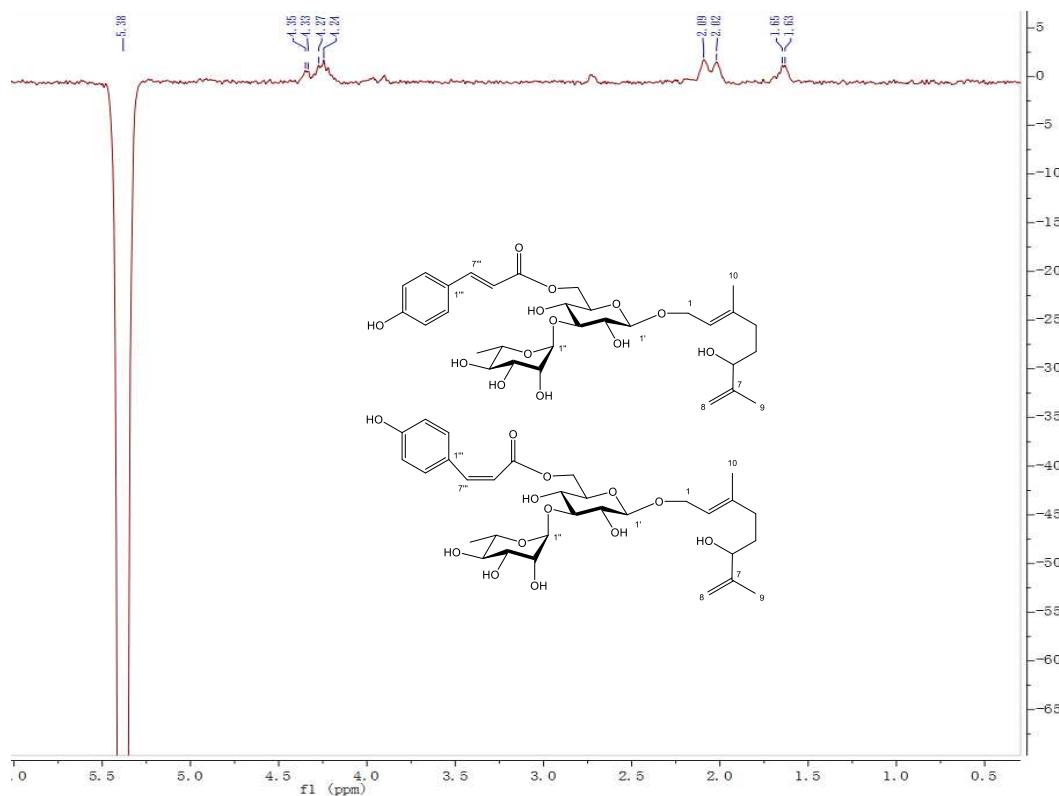

Figure S4-6 NOESY spectrum of compound **4** in CD<sub>3</sub>OD (600 MHz)



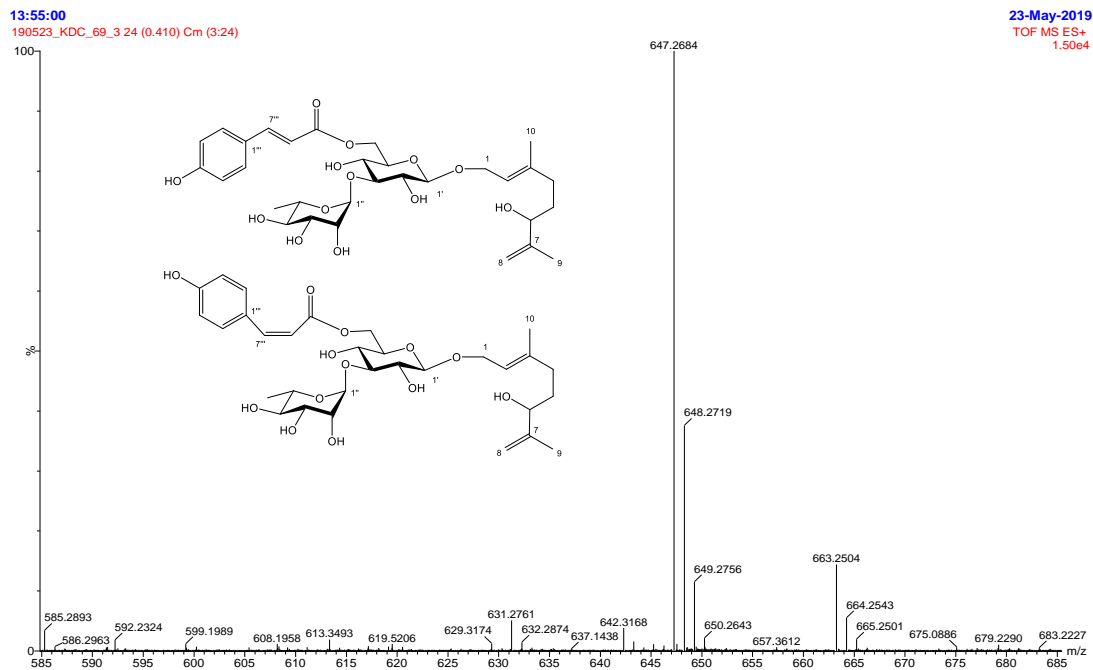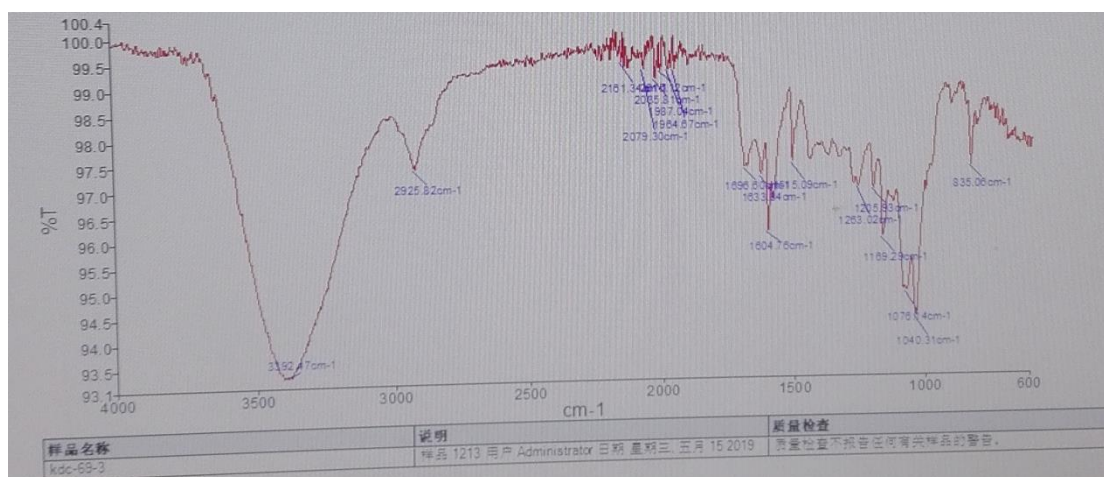

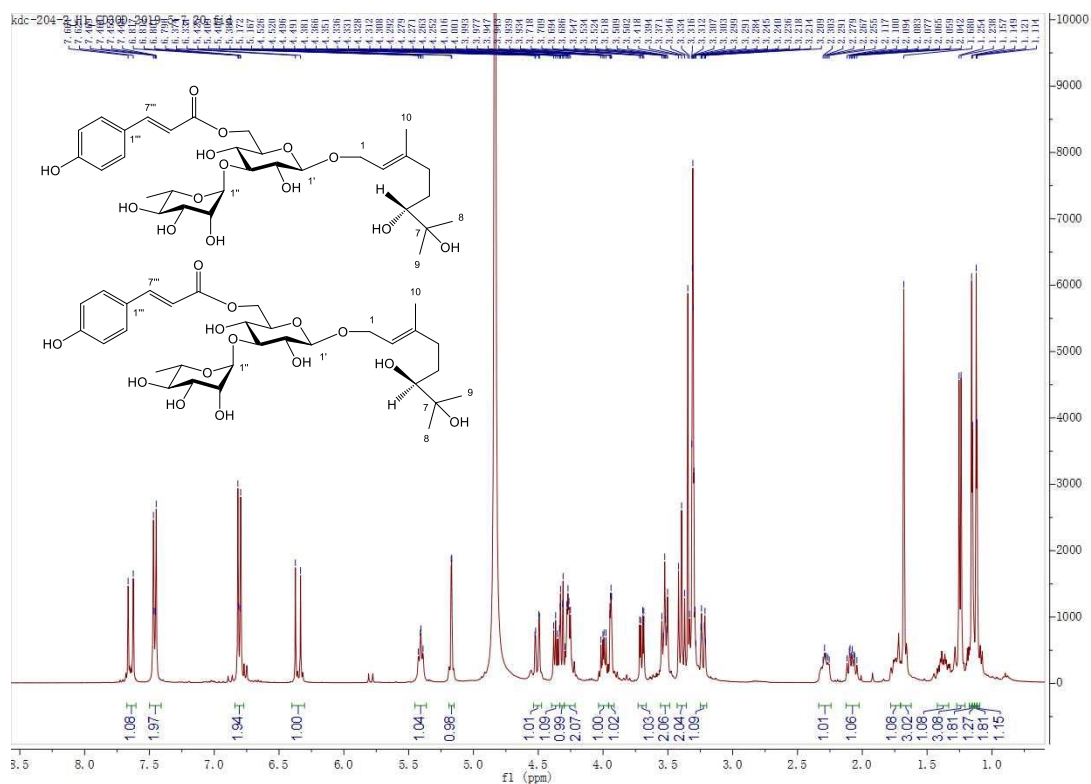

Figure S5-1 <sup>1</sup>H NMR spectrum of compound **5** in CD<sub>3</sub>OD (400 MHz)

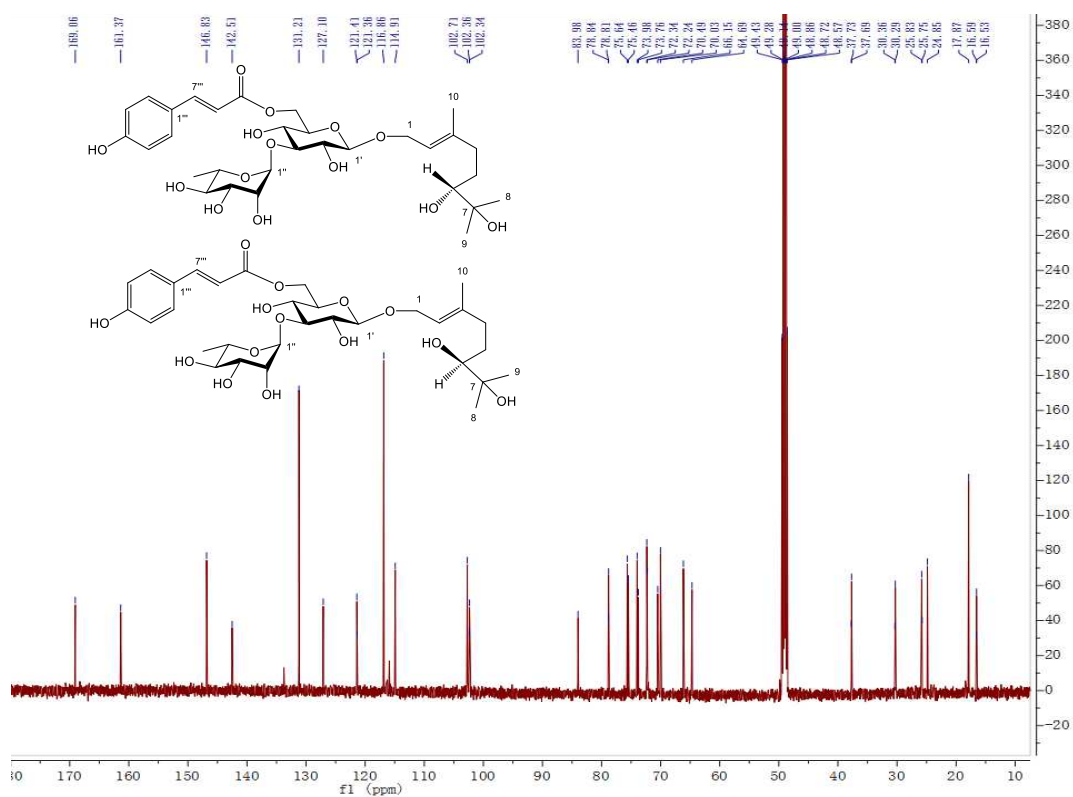

Figure S5-2 <sup>13</sup>C NMR spectrum of compound **5** in CD<sub>3</sub>OD (150 MHz)

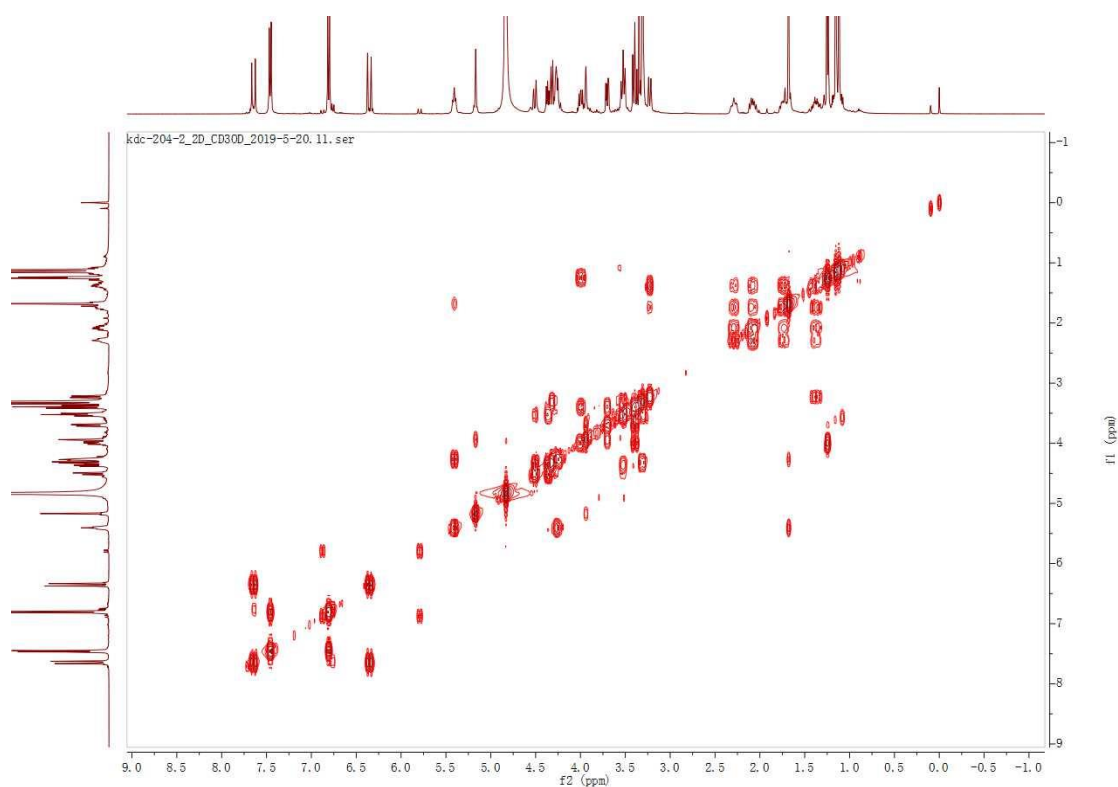

Figure S5-3  $^1\text{H}$ - $^1\text{H}$  COSY spectrum of compound **5** in  $\text{CD}_3\text{OD}$

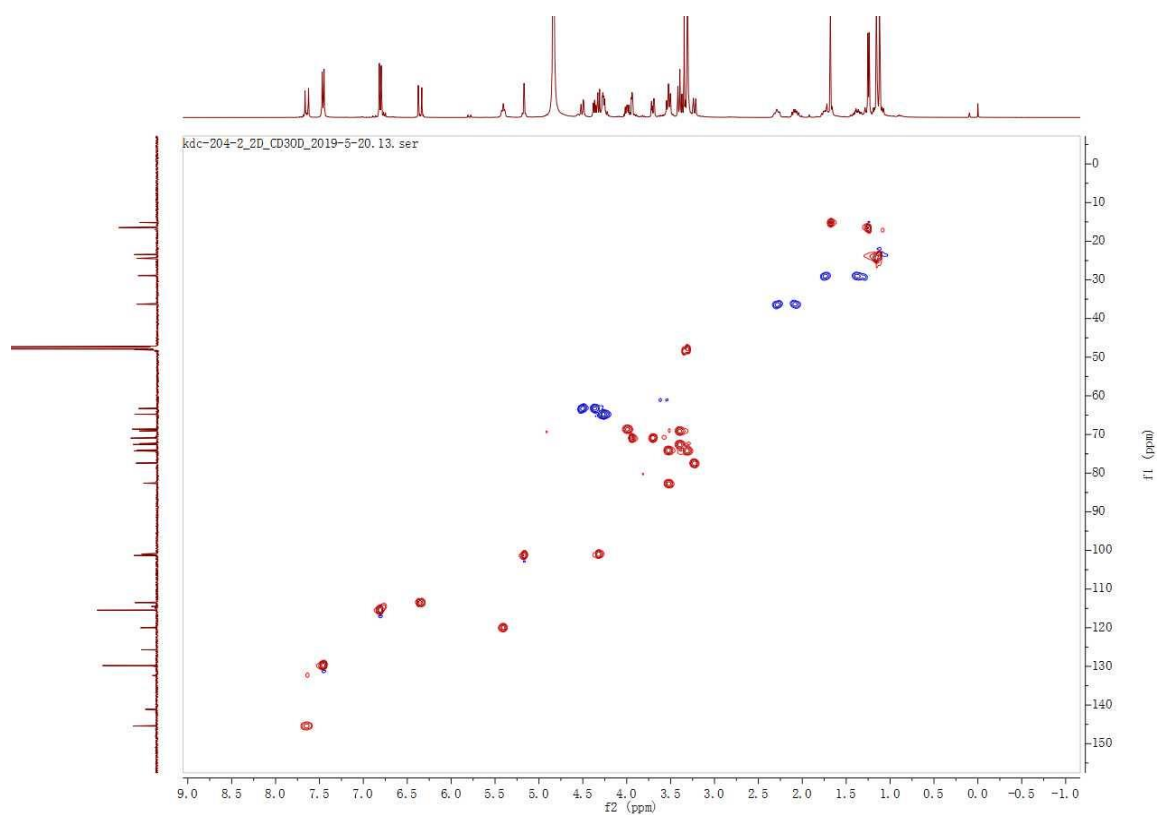

Figure S5-4 HSQC spectrum of compound **5** in  $\text{CD}_3\text{OD}$

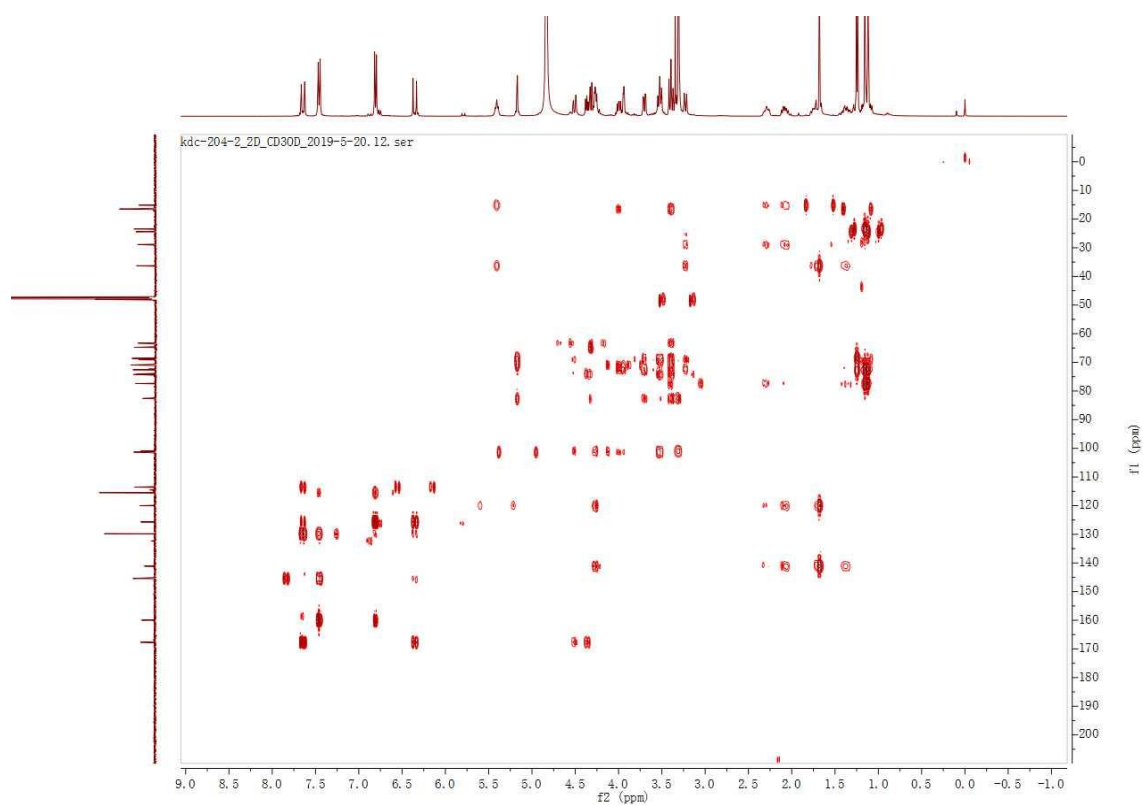

Figure S5-5 HMBC spectrum of compound **5** in CD<sub>3</sub>OD

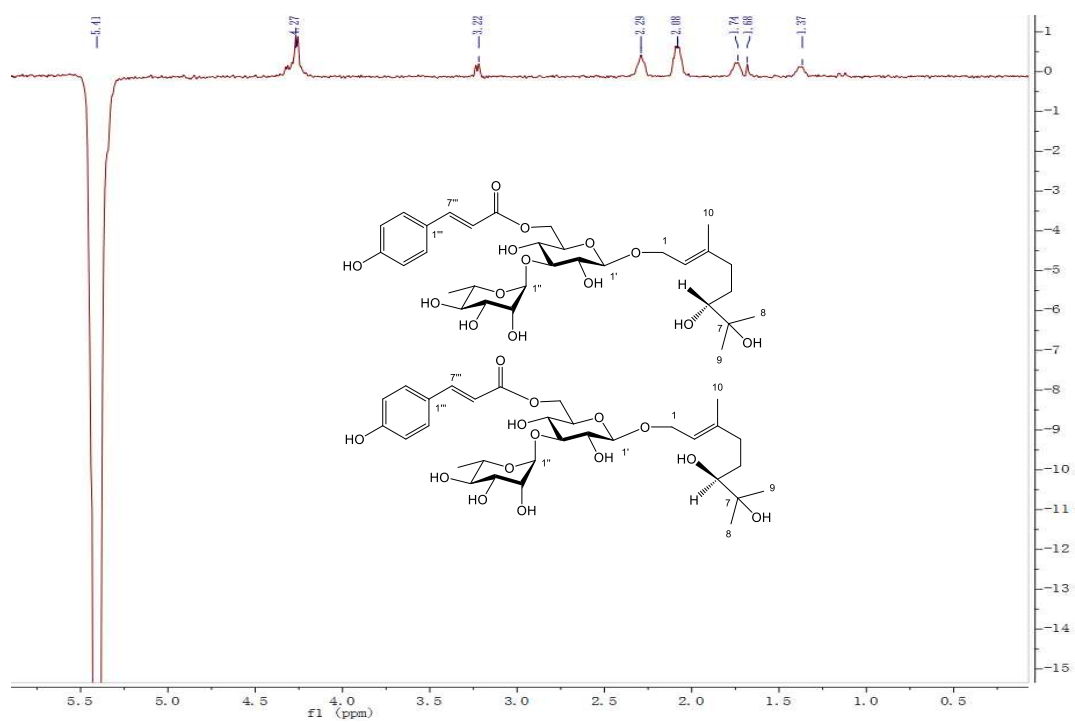

Figure S5-6 NOESY spectrum of compound **5** in CD<sub>3</sub>OD (600 MHz)

13:29:12  
190606\_KDC\_204\_2 6 (0.103) Cm (3:23)

06-Jun-2019  
TOF MS ES+  
9.86e3

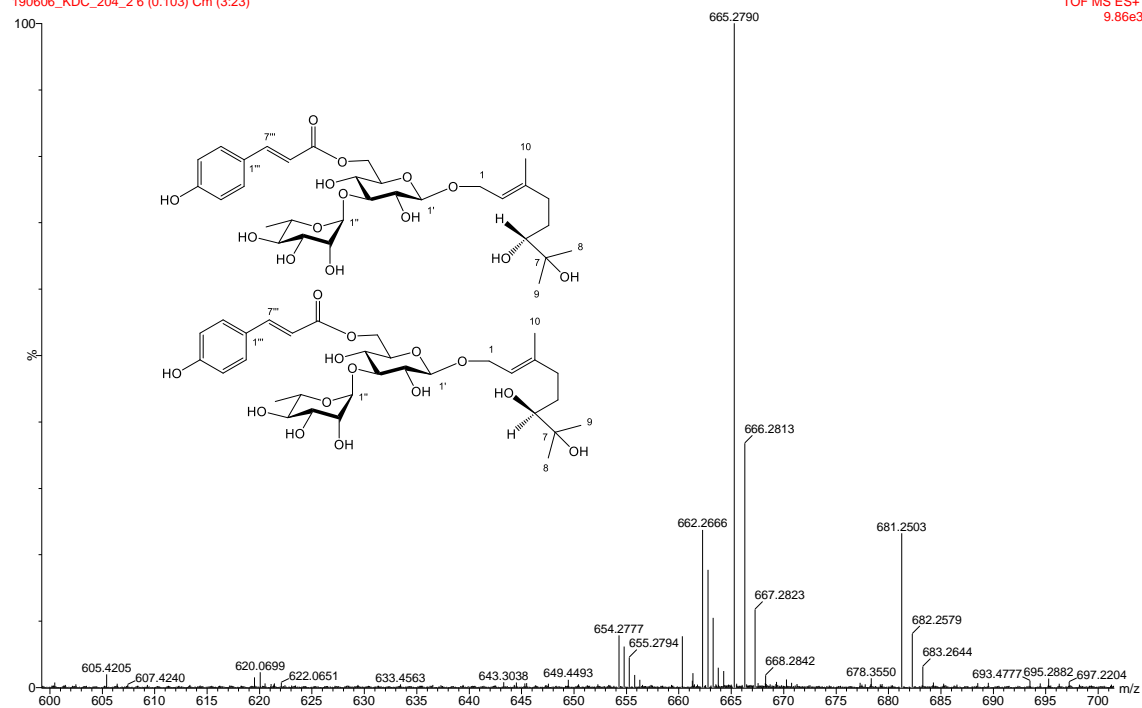

Figure S5-7 HRESIMS spectrum of compound **5**

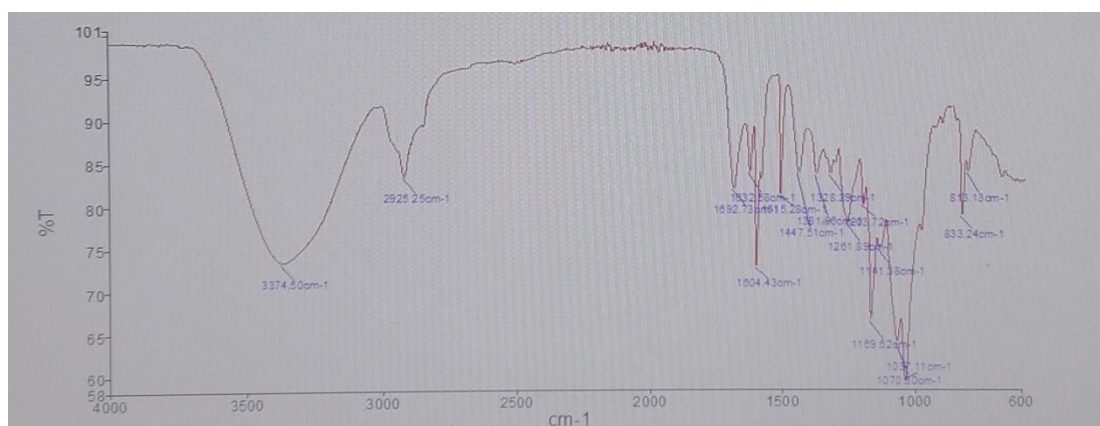

Figure S5-8 IR spectrum of compound **5** (film)

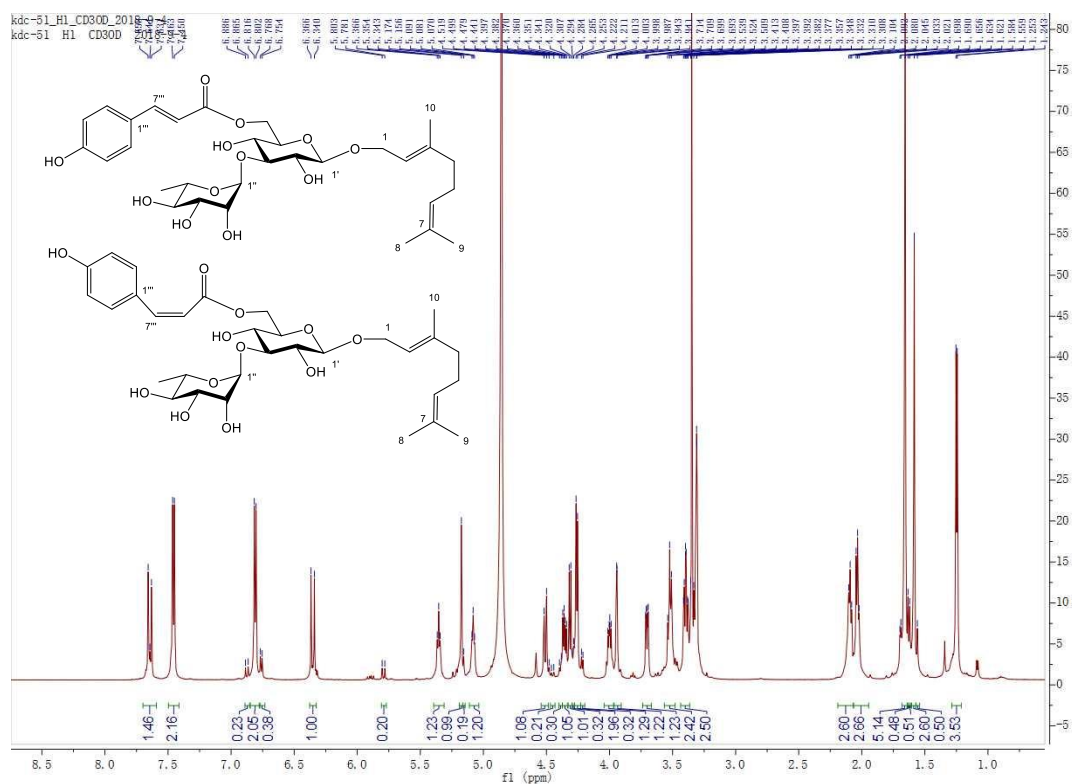

Figure S6-1  $^1\text{H}$  NMR spectrum of compound **6** in  $\text{CD}_3\text{OD}$  (600 MHz)

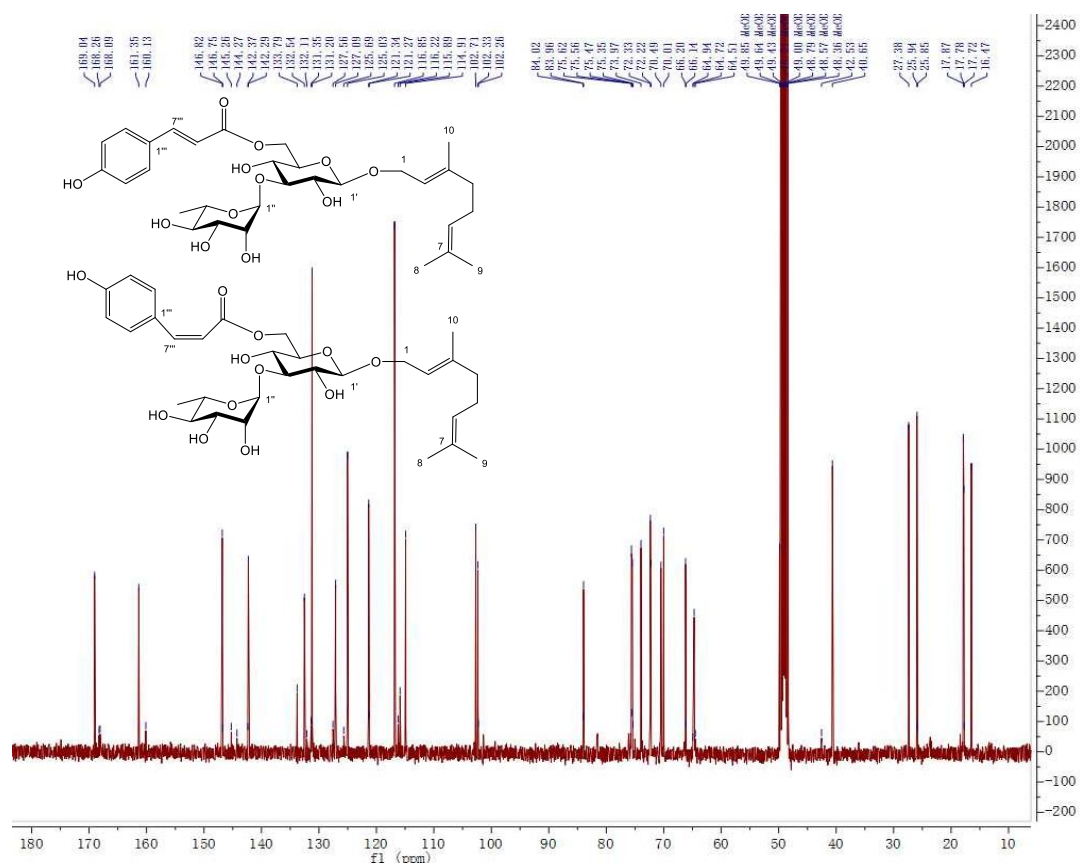

Figure S6-2  $^{13}\text{C}$  NMR spectrum of compound **6** in  $\text{CD}_3\text{OD}$  (100 MHz)

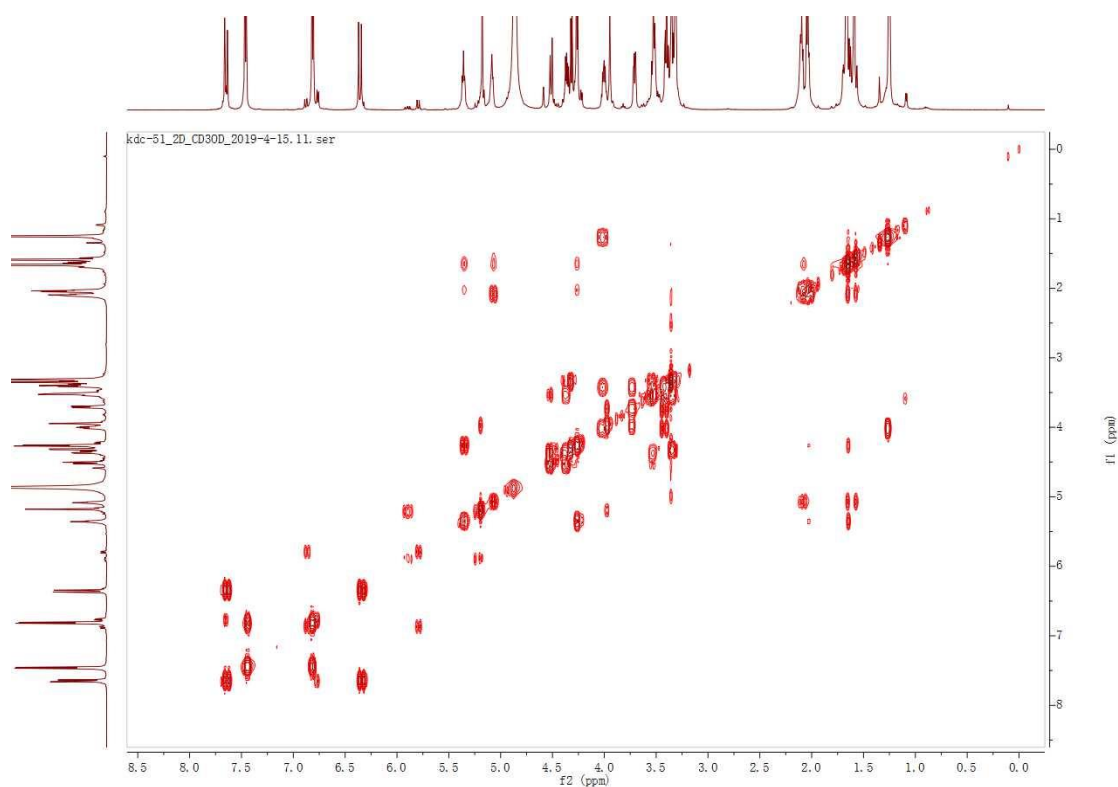

Figure S6-3  $^1\text{H}$ - $^1\text{H}$  COSY spectrum of compound **6** in  $\text{CD}_3\text{OD}$

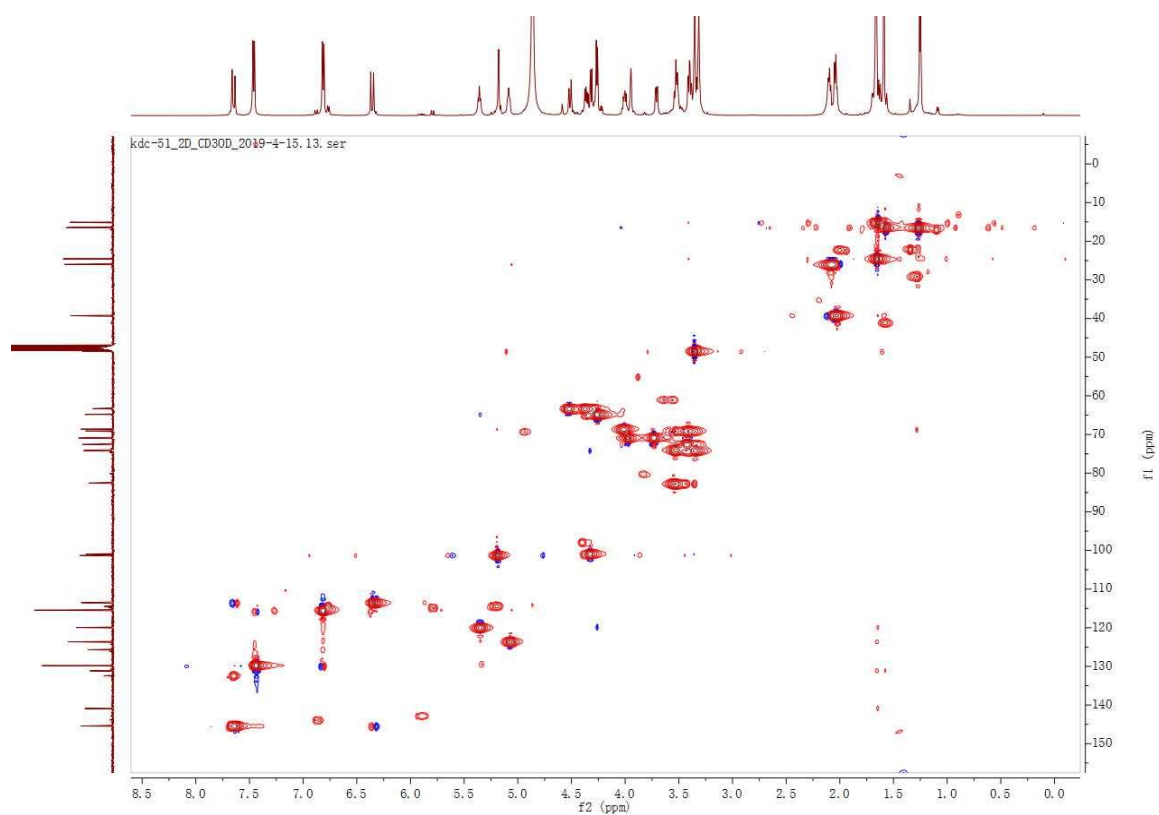

Figure S6-4 HSQC spectrum of compound **6** in  $\text{CD}_3\text{OD}$



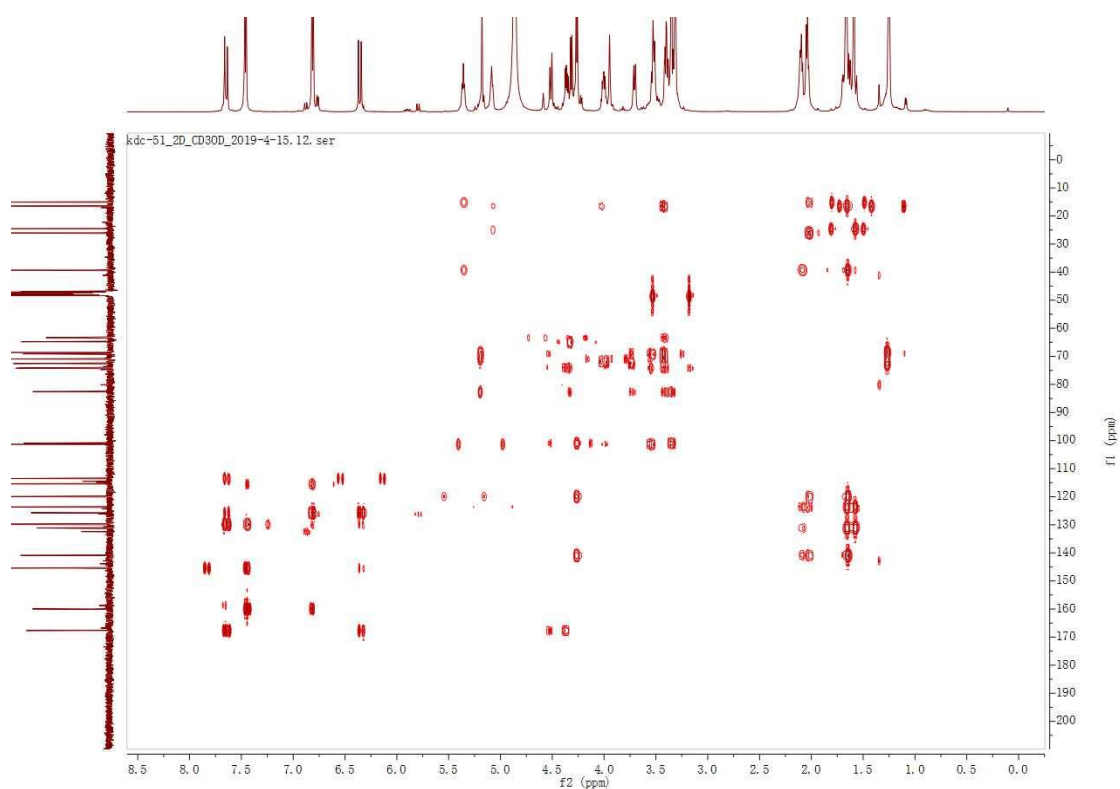

Figure S6-5 HMBC spectrum of compound **6** in CD<sub>3</sub>OD

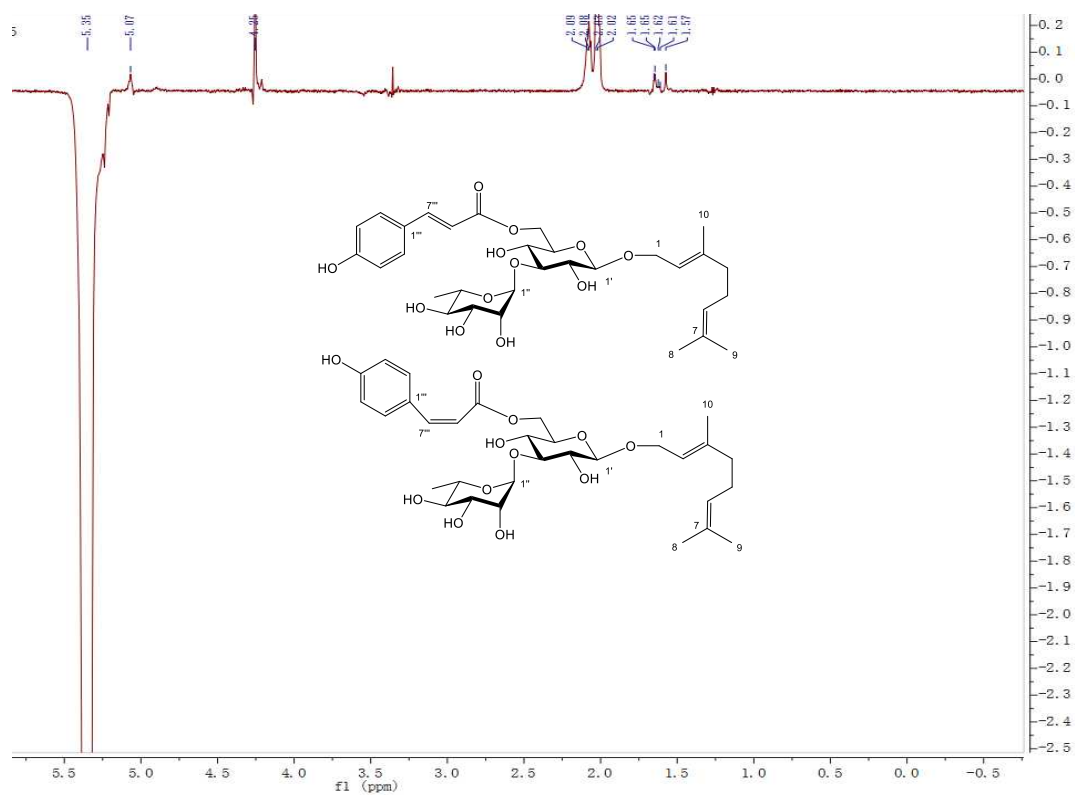

Figure S6-6 NOESY spectrum of compound **6** in CD<sub>3</sub>OD (600 MHz)

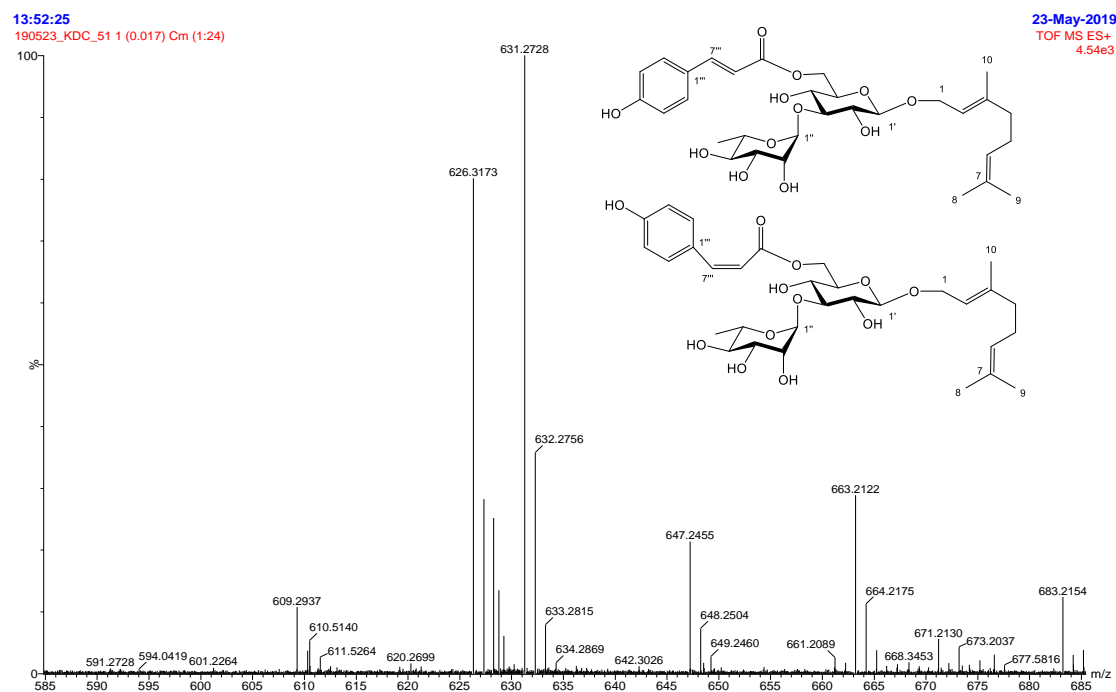

Figure S6-7 HRESIMS spectrum of compound **6**

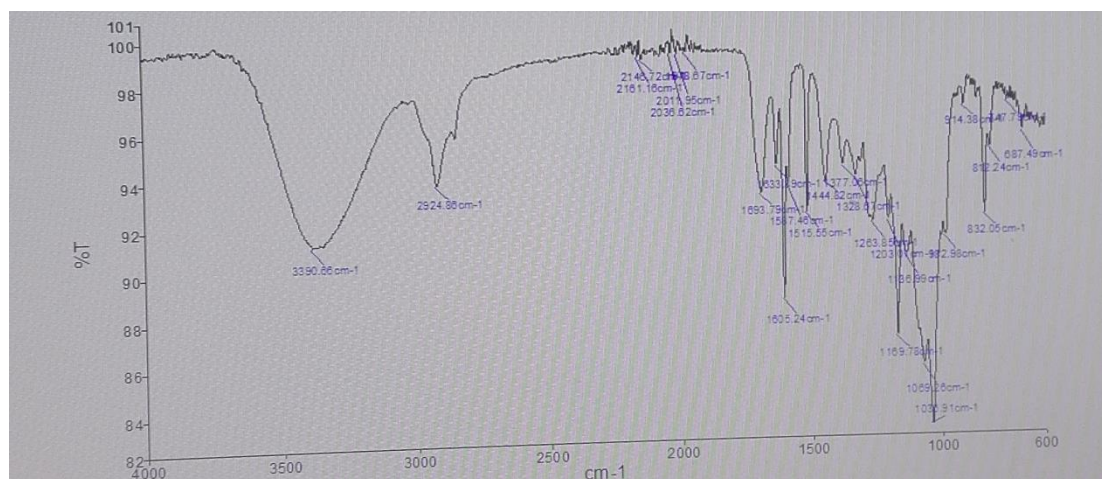

Figure S6-8 IR spectrum of compound **6** (film)

*S1. <sup>1</sup>H, <sup>13</sup>C NMR data of Compounds 4a, 6a, 7, 8a and 8b*

Compound **4a** (ligurobustoside F): white amorphous powder. <sup>1</sup>H NMR (400 MHz, CD<sub>3</sub>OD)  $\delta$ : aglycone 4.25 (1H, dd,  $J$  = 6.4, 6.0 Hz, H-1a), 4.34 (1H, dd,  $J$  = 12.0, 6.0 Hz, H-1b), 5.38 (1H, dd,  $J$  = 12.0, 6.4 Hz, H-2), 2.07 (2H, m, H-4), 1.63 (2H, m, H-5), 3.97 (1H, t,  $J$  = 6.0 Hz, H-6), 4.81 (1H, d,  $J$  = 2.0 Hz, H-8a), 4.91 (1H, d,  $J$  = 2.0 Hz, H-8b), 1.70 (3H, s, H-9), 1.68 (3H, s, H-10); Glc 4.31 (1H, d,  $J$  = 8.0 Hz, H-1'), 3.29 (1H, m, H-2'), 3.50 (1H, m, H-3'), 3.37 (1H, m, H-4'), 3.51 (1H, m, H-5'), 4.35 (1H, dd,  $J$  = 12.0, 6.0 Hz, H-6a'), 4.50 (1H, dd,  $J$  = 12.0, 2.0 Hz, H-6b'); Rha 5.17 (1H, d,  $J$  = 1.6 Hz, H-1''), 3.93 (1H, m, H-2''), 3.70 (1H, dd,  $J$  = 9.6, 3.2 Hz, H-3''), 3.39 (1H, m, H-4''), 4.00 (1H, dd,  $J$  = 9.6, 6.4 Hz, H-5''), 1.25 (3H, d,  $J$  = 6.4 Hz, H-6''); Cou 7.44 (2H, d,  $J$  = 8.8 Hz, H-2''', 6'''), 6.77 (2H, d,  $J$  = 8.8 Hz, H-3''', 5'''), 7.64 (1H, d,  $J$  = 16.0 Hz, H-7'''), 6.32 (1H, d,  $J$  = 16.0 Hz, H-8'''). <sup>13</sup>C NMR (150 MHz, CD<sub>3</sub>OD)  $\delta$ : aglycone 66.4 (C-1), 121.7 (C-2), 144.2 (C-3), 36.7 (C-4), 34.2 (C-5), 76.2 (C-6), 148.8 (C-7), 111.5 (C-8), 17.6 (C-9), 16.6 (C-10); Glc 102.4 (C-1'), 75.6 (C-2'), 84.6 (C-3'), 70.5 (C-4'), 75.5 (C-5'), 64.6 (C-6'); Rha 102.7 (C-1''), 72.4 (C-2''), 72.3 (C-3''), 74.0 (C-4''), 70.1 (C-5''), 17.9 (C-6''); Cou 125.9 (C-1'''), 131.2 (C-2''', 6'''), 117.6 (C-3''', 5'''), 163.6 (C-4'''), 147.3 (C-7'''), 113.8 (C-8'''), 169.3 (CO).

Compound **6a** (ligurobustoside E): yellow oil. <sup>1</sup>H NMR (600 MHz, CD<sub>3</sub>OD)  $\delta$ : aglycone 4.26 (2H, d,  $J$  = 7.2 Hz, H-1a), 5.35 (1H, t,  $J$  = 7.2 Hz, H-2), 2.03 (2H, t,  $J$  = 7.2 Hz, H-4), 2.09 (2H, m, H-5), 5.08 (1H, t,  $J$  = 6.6 Hz, H-6), 1.66 (3H, s, H-8), 1.58 (3H, s, H-9), 1.66 (3H, s, H-10); Glc 4.31 (1H, d,  $J$  = 7.8 Hz, H-1'), 3.34 (1H, m, H-2'), 3.52 (1H, m, H-3'), 3.40 (1H, t,  $J$  = 9.6 Hz, H-4'), 3.52 (1H, m, H-5'), 4.35 (1H, dd,  $J$  = 12.0, 6.0 Hz, H-6a'), 4.50 (1H, br. d,  $J$  = 12.0 Hz, H-6b'); Rha 5.17 (1H, br. s, H-1''), 3.94 (1H, m, H-2''), 3.70 (1H, dd,  $J$  = 9.6, 3.6 Hz, H-3''), 3.40 (1H, t,  $J$  = 9.6 Hz, H-4''), 4.00 (1H, dd,  $J$  = 9.6, 6.0 Hz, H-5''), 1.25 (3H, d,  $J$  = 6.0 Hz, H-6''); Cou 7.46 (2H, d,  $J$  = 8.4 Hz, H-2''', 6'''), 6.81 (2H, d,  $J$  = 8.4 Hz, H-3''', 5'''), 7.64 (1H, d,  $J$  = 16.2 Hz, H-7'''), 6.35 (1H, d,  $J$  = 16.2 Hz, H-8'''). <sup>13</sup>C NMR (100 MHz, CD<sub>3</sub>OD)  $\delta$ : aglycone 66.2 (C-1), 121.3 (C-2), 142.3 (C-3), 40.7 (C-4), 27.4 (C-5), 125.0 (C-6), 132.5 (C-7), 25.9 (C-8), 17.8 (C-9), 16.5 (C-10); Glc 102.3 (C-1'), 75.6 (C-2'), 84.0 (C-3'), 70.5 (C-4'), 75.5 (C-5'), 64.7 (C-6'); Rha 102.7 (C-1''), 72.3 (C-2''), 72.2 (C-3''), 74.0 (C-4''), 70.0 (C-5''), 17.9 (C-6''); Cou 127.1 (C-1'''), 131.2 (C-2''', 6'''), 116.9 (C-3''', 5'''), 161.3 (C-4'''), 146.8 (C-7'''), 114.9 (C-8'''), 169.0 (CO).

Compound **7** (ligurobustoside J): white amorphous powder. <sup>1</sup>H NMR (400 MHz, CD<sub>3</sub>OD)  $\delta$ : aglycone 4.28 (1H, dd,  $J$  = 12.8, 7.2 Hz, H-1a), 4.34 (1H, dd,  $J$  = 12.8, 6.4

Hz, H-1b), 5.38 (1H, t,  $J = 6.4$  Hz, H-2), 2.07 (2H, t,  $J = 6.8$  Hz, H-4), 2.13 (2H, t,  $J = 6.8$  Hz, H-5), 5.12 (1H, m, H-6), 1.68 (3H, s, H-8), 1.61 (3H, s, H-9), 1.68 (3H, s, H-10); Glc 4.37 (1H, d,  $J = 8.0$  Hz, H-1'), 3.51 (1H, m, H-2'), 3.81 (1H, t,  $J = 9.2$  Hz, H-3'), 4.94 (1H, t,  $J = 9.2$  Hz, H-4'), 3.56 (1H, m, H-5'), 3.54 (1H, m, H-6a'), 3.62 (1H, m, H-6b'); inner Rha 5.19 (1H, d,  $J = 1.6$  Hz, H-1''), 3.86 (1H, dd,  $J = 3.2, 1.6$  Hz, H-2''), 3.67 (1H, dd,  $J = 9.2, 3.2$  Hz, H-3''), 3.39 (1H, t,  $J = 9.2$  Hz, H-4''), 3.60 (1H, m, H-5''), 1.09 (3H, d,  $J = 6.0$  Hz, H-6''); outer Rha 5.04 (1H, d,  $J = 1.6$  Hz, H-1'''), 3.88 (1H, dd,  $J = 3.2, 1.6$  Hz, H-2'''), 3.51 (1H, m, H-3'''), 3.32 (1H, m, H-4'''), 3.46 (1H, dd,  $J = 9.6, 6.0$  Hz, H-5'''), 1.06 (3H, d,  $J = 6.0$  Hz, H-6'''); Cou 7.48 (2H, d,  $J = 8.4$  Hz, H-2''', 6'''), 6.83 (2H, d,  $J = 8.4$  Hz, H-3''', 5'''), 7.66 (1H, d,  $J = 16.0$  Hz, H-7'''), 6.33 (1H, d,  $J = 16.0$  Hz, H-8''').  $^{13}\text{C}$  NMR (150 MHz,  $\text{CD}_3\text{OD}$ )  $\delta$ : aglycone 66.5 (C-1), 121.5 (C-2), 142.1 (C-3), 40.7 (C-4), 27.4 (C-5), 125.1 (C-6), 132.5 (C-7), 25.9 (C-8), 17.7 (C-9), 16.5 (C-10); Glc 102.5 (C-1'), 76.1 (C-2'), 81.6 (C-3'), 70.5 (C-4'), 76.1 (C-5'), 62.4 (C-6'); inner Rha 102.7 (C-1''), 72.8 (C-2''), 72.6 (C-3''), 81.7 (C-4''), 68.9 (C-5''), 19.2 (C-6''); outer Rha 103.5 (C-1'''), 72.3 (C-2'''), 72.3 (C-3'''), 73.8 (C-4'''), 70.3 (C-5'''), 17.8 (C-6'''); Cou 127.0 (C-1'''), 131.4 (C-2''', 6'''), 117.1 (C-3''', 5'''), 161.5 (C-4'''), 147.6 (C-7'''), 114.7 (C-8'''), 168.1 (CO).

Compound **8a** (lipidoside B-II): white amorphous powder.  $^1\text{H}$  NMR (600 MHz,  $\text{CD}_3\text{OD}$ )  $\delta$ : aglycone 5.22 (1H, dd,  $J = 10.8, 1.2$  Hz, H-1a), 5.25 (1H, dd,  $J = 17.4, 1.2$  Hz, H-1b), 5.93 (1H, dd,  $J = 17.4, 10.8$  Hz, H-2), 1.59 (1H, m, H-4a), 1.62 (1H, m, H-4b), 2.05 (2H, m, H-5), 5.10 (1H, t,  $J = 7.2$  Hz, H-6), 1.67 (3H, s, H-8), 1.60 (3H, s, H-9), 1.39 (3H, s, H-10); Glc 4.40 (1H, d,  $J = 7.8$  Hz, H-1'), 3.37 (1H, m, H-2'), 3.72 (1H, t,  $J = 9.6$  Hz, H-3'), 4.89 (1H, t,  $J = 9.6$  Hz, H-4'), 3.46 (1H, m, H-5'), 3.50 (1H, m, H-6a'), 3.57 (1H, m, H-6b'); Rha 5.16 (1H, d,  $J = 1.2$  Hz, H-1''), 3.91 (1H, m, H-2''), 3.59 (1H, m, H-3''), 3.29 (1H, m, H-4''), 3.57 (1H, m, H-5''), 1.16 (3H, d,  $J = 6.6$  Hz, H-6''); Cou 7.72 (2H, d,  $J = 8.4$  Hz, H-2''', 6'''), 6.76 (2H, d,  $J = 8.4$  Hz, H-3''', 5'''), 6.94 (1H, d,  $J = 12.6$  Hz, H-7'''), 5.79 (1H, d,  $J = 12.6$  Hz, H-8''').  $^{13}\text{C}$  NMR (100 MHz,  $\text{CD}_3\text{OD}$ )  $\delta$ : aglycone 115.9 (C-1), 144.3 (C-2), 81.6 (C-3), 42.6 (C-4), 23.6 (C-5), 125.6 (C-6), 132.2 (C-7), 25.8 (C-8), 17.7 (C-9), 23.1 (C-10); Glc 99.4 (C-1'), 76.1 (C-2'), 82.2 (C-3'), 70.6 (C-4'), 75.7 (C-5'), 62.5 (C-6'); Rha 103.0 (C-1''), 72.3 (C-2''), 72.1 (C-3''), 73.7 (C-4''), 70.3 (C-5''), 18.2 (C-6''); Cou 127.5 (C-1'''), 134.3 (C-2''', 6'''), 115.8 (C-3''', 5'''), 160.4 (C-4'''), 147.2 (C-7'''), 115.9 (C-8'''), 166.9 (CO).

Compound **8b** (lipidoside B-III): white amorphous powder.  $^1\text{H}$  NMR (600 MHz,  $\text{CD}_3\text{OD}$ )  $\delta$ : aglycone 5.22 (1H, dd,  $J = 10.8, 1.2$  Hz, H-1a), 5.25 (1H, dd,  $J = 17.4, 1.2$

Hz, H-1b), 5.93 (1H, dd,  $J = 17.4, 10.8$  Hz, H-2), 1.59 (1H, m, H-4a), 1.62 (1H, m, H-4b), 2.05 (2H, m, H-5), 5.10 (1H, t,  $J = 7.2$  Hz, H-6), 1.67 (3H, s, H-8), 1.60 (3H, s, H-9), 1.39 (3H, s, H-10); Glc 4.43 (1H, d,  $J = 7.8$  Hz, H-1'), 3.37 (1H, m, H-2'), 3.77 (1H, t,  $J = 9.6$  Hz, H-3'), 4.89 (1H, t,  $J = 9.6$  Hz, H-4'), 3.46 (1H, m, H-5'), 3.50 (1H, m, H-6a'), 3.57 (1H, m, H-6b'); Rha 5.18 (1H, d,  $J = 1.2$  Hz, H-1''), 3.91 (1H, m, H-2''), 3.59 (1H, m, H-3''), 3.29 (1H, m, H-4''), 3.57 (1H, m, H-5''), 1.08 (3H, d,  $J = 6.0$  Hz, H-6''); Cou 7.47 (2H, d,  $J = 8.4$  Hz, H-2''', 6'''), 6.81 (2H, d,  $J = 8.4$  Hz, H-3''', 5'''), 7.65 (1H, d,  $J = 16.2$  Hz, H-7'''), 6.33 (1H, d,  $J = 16.2$  Hz, H-8''').  $^{13}\text{C}$  NMR (100 MHz,  $\text{CD}_3\text{OD}$ )  $\delta$ : aglycone 115.9 (C-1), 144.3 (C-2), 81.6 (C-3), 42.6 (C-4), 23.6 (C-5), 125.6 (C-6), 132.2 (C-7), 25.8 (C-8), 17.7 (C-9), 23.1 (C-10); Glc 99.4 (C-1'), 76.2 (C-2'), 81.9 (C-3'), 70.7 (C-4'), 75.7 (C-5'), 62.5 (C-6'); Rha 103.0 (C-1''), 72.3 (C-2''), 72.0 (C-3''), 73.7 (C-4''), 70.3 (C-5''), 18.4 (C-6''); Cou 127.1 (C-1'''), 131.3 (C-2''', 6'''), 116.8 (C-3''', 5'''), 161.4 (C-4'''), 147.5 (C-7'''), 114.8 (C-8'''), 168.3 (CO).

## S2. Determination of bioactivities

### S2.1. Determination of FAS inhibitory activity

Compounds **1-8** (1.0-1.7 mg) were dissolved in DMSO (100  $\mu\text{L}$ ) and then diluted with potassium phosphate buffer (0.1 M, pH 7.0). Sample solution (100  $\mu\text{L}$ , 20-2000  $\mu\text{M}$ , 37  $^\circ\text{C}$ ) and FAS substrates (1.8 mL, 37  $^\circ\text{C}$ ) were mixed in a cuvette, and then FAS solution (100  $\mu\text{L}$ , 37  $^\circ\text{C}$ , isolated from chicken liver and kept in ice-bath before use) was added. The absorbance of reaction compound was monitored by a UV-vis spectrophotometer at 340 nm in 1 min. The inhibitory effect was calculated by the following equation: FAS inhibition (%) =  $(A_{\text{control}} - A_{\text{sample}})/A_{\text{control}} \times 100\%$ , where  $A_{\text{control}}$  represented the FAS activity in the control group (phosphate buffer instead of sample solution),  $A_{\text{sample}}$  represented the FAS activity in the sample groups. The FAS activity was calculated as  $(A_0 - A_1)/1$  min, in which  $A_0$  was the absorbance of the reaction compound when the FAS was added, and  $A_1$  was the absorbance of the reaction compound after reaction 1 min. Orlistat was used as the positive control.

FAS substrates: 0.1 M potassium phosphate buffer (pH 7.0), 1 mM ethylenediaminetetraacetic acid (EDTA), 1 mM dithiothreitol, 3  $\mu\text{M}$  acetyl-coenzyme A, 10  $\mu\text{M}$  methylmalonyl coenzyme A, 35  $\mu\text{M}$  NADPH.

### S2.2. Determination of $\alpha$ -glucosidase inhibitory activity

Compounds **1-8** (1.0-1.7 mg) were dissolved in DMSO (100  $\mu\text{L}$ ) and then diluted with phosphate buffer (0.1 M, pH 6.8). Sample solution (50  $\mu\text{L}$ , 0.078-78 nM) and

4-nitrophenyl  $\alpha$ -D-glucopyranoside (pNPG) solution (50  $\mu$ L, 5 mM) were mixed and incubated in a 96-well microplate at 37 °C for 5 min.  $\alpha$ -Glucosidase from yeast (50  $\mu$ L, 0.2 U/mL) was added and incubated at 37 °C for another 30 min. Finally, 50  $\mu$ L of Na<sub>2</sub>CO<sub>3</sub> (1M) was added to terminate the reaction. The absorbance of compound was measured using a microplate reader at a wavelength 405 nm. The background absorbance (phosphate buffer instead of substrate pNPG) of all samples in no more than 20  $\mu$ M at 405 nm was little, therefore the inhibitory effect was calculated by the following equation:  $\alpha$ -glucosidase inhibition (%) =  $(A_{\text{control}} - A_{\text{sample}})/A_{\text{control}} \times 100\%$ , where  $A_{\text{control}}$  represented the absorbance of phosphate buffer control without test samples,  $A_{\text{sample}}$  represented the absorbance of test samples. Acarbose was used as the positive control.

### S2.3. Determination of $\alpha$ -amylase inhibitory activity

Phosphate buffer (20 mM, pH 6.9, containing 6 mM NaCl) was used as the solvent in this assay. Sample solution (50  $\mu$ L, 50-1500  $\mu$ M) and starch solution (50  $\mu$ L, 1%, w/v) were mixed and incubated in a 96-well microplate at 37 °C for 10 min. Then,  $\alpha$ -amylase solution (50  $\mu$ L, 0.2 U/mL) was added and the compound was incubated at 37 °C for an additional 10 min. The reaction was stopped by addition of 3, 5-dinitrosalicylic acid colour reagent (100  $\mu$ L, 27.6 mM) and the 96-well microplate was immediately heated in 95 °C water bath for 10 min. When the reaction solution cooled to room temperature, all samples were diluted by adding distilled water (50  $\mu$ L), and then their absorbance was measured using a microplate reader at 540 nm. All samples had little background absorbance (phosphate buffer instead of starch solution) at 540 nm, thus the inhibitory activity was calculated as  $(A_{\text{control}} - A_{\text{sample}})/A_{\text{control}} \times 100\%$ , in which  $A_{\text{sample}}$  was the absorbance of the sample and  $A_{\text{control}}$  was the absorbance of the phosphate buffer control without test samples. Acarbose was used as the positive control.

### S2.4. DPPH radical scavenging assay

The DPPH radical scavenging assay was used to evaluate the antioxidant activity of compounds **1-8**. In a 96-well microplate, 100  $\mu$ L of DPPH solution (200  $\mu$ M in ethanol) was added to 100  $\mu$ L sample in ethanol at graded concentrations ranging

from 7 to 500  $\mu\text{M}$ . The compound was incubated in the dark at room temperature for 30 min. The absorbance of the reaction compound was measured at 517 nm using a microplate reader. The DPPH scavenging activity was calculated by the following formula: DPPH scavenging activity (%) =  $(A_{\text{control}} - A_{\text{sample}})/A_{\text{control}} \times 100\%$ , where  $A_{\text{control}}$  was the absorbance of ethanol control without samples,  $A_{\text{sample}}$  was the absorbance of sample. Ascorbic acid was used as the positive control in the experiment.

#### S2.5. ABTS radical scavenging assay

The ABTS radical scavenging assay was used also to evaluate the antioxidant activity of compounds **1-8**. The ABTS free radical cation ( $\text{ABTS}^{\bullet+}$ ) was manufactured by reacting ABTS stock solution (7 mM) with potassium persulphate (2.45 mM) in the dark at room temperature for 12-16 h. The  $\text{ABTS}^{\bullet+}$  solution was diluted with ethanol to an absorbance of 0.7 at 734 nm. Sample solution (100  $\mu\text{L}$ , 2-100  $\mu\text{M}$  in ethanol) was mixed with 150  $\mu\text{L}$  diluted  $\text{ABTS}^{\bullet+}$  solution. After reaction in the dark at room temperature for 20 min, the absorbance of the reaction compound at 734 nm was recorded. The  $\text{ABTS}^{\bullet+}$  scavenging capability was calculated as  $(A_{\text{control}} - A_{\text{sample}})/A_{\text{control}} \times 100\%$ , in which  $A_{\text{control}}$  was the absorbance of ethanol control without samples,  $A_{\text{sample}}$  was the absorbance of sample. Ascorbic acid was used as the positive control.
